# Supplementary material for: Efficacy of Aedes aegypti control by indoor Ultra Low Volume (ULV) insecticide spraying in Iquitos, Peru
Source: PubMed Central journal article supplement (PMC5906025; doi:10.1371/journal.pntd.0006378), 2018-04-06
Supplement: pntd.0006378.s001.pdf [file pntd.0006378.s001.pdf]

## Supporting Information: All Figures & Tables

Efficacy of *Aedes aegypti* control by indoor Ultra Low Volume (ULV) insecticide spraying in Iquitos, Peru. CE Gunning, K Okamoto, H Astete, GM Vasquez, EB Erhardt, C Del Aguila, R Pinedo, R Cardenas, C Pacheco4, E Chalco, H Rodriguez-Ferruci, TW Scott, AL Lloyd, F Gould and AC Morrison. PLoS Negl Trop Dis. 2018. Data available at <https://doi.org/10.5061/dryad.160023v>

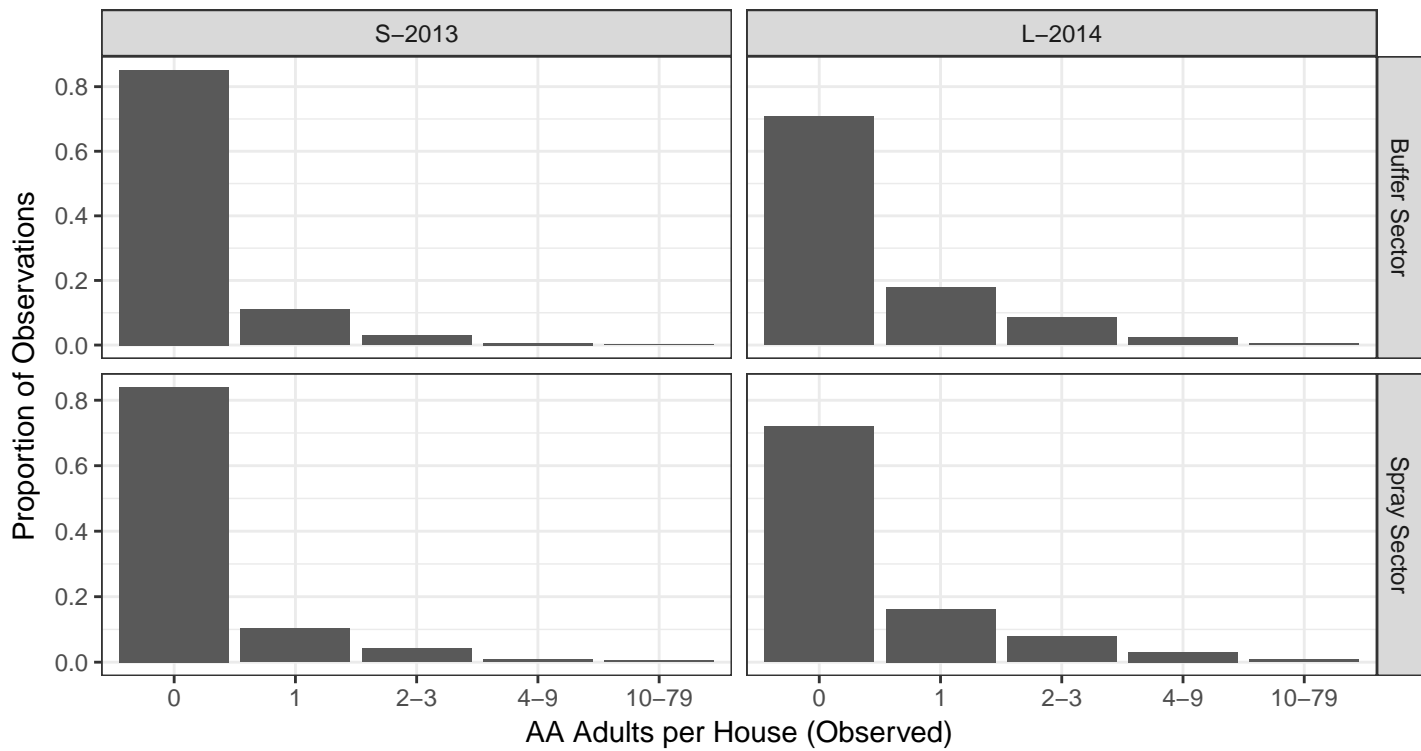

**Figure S1.** Histogram of AA/HSE at baseline (C1). Rows show treatment sector. X-axis is sqrt-scaled. The majority of house surveys find no adults.

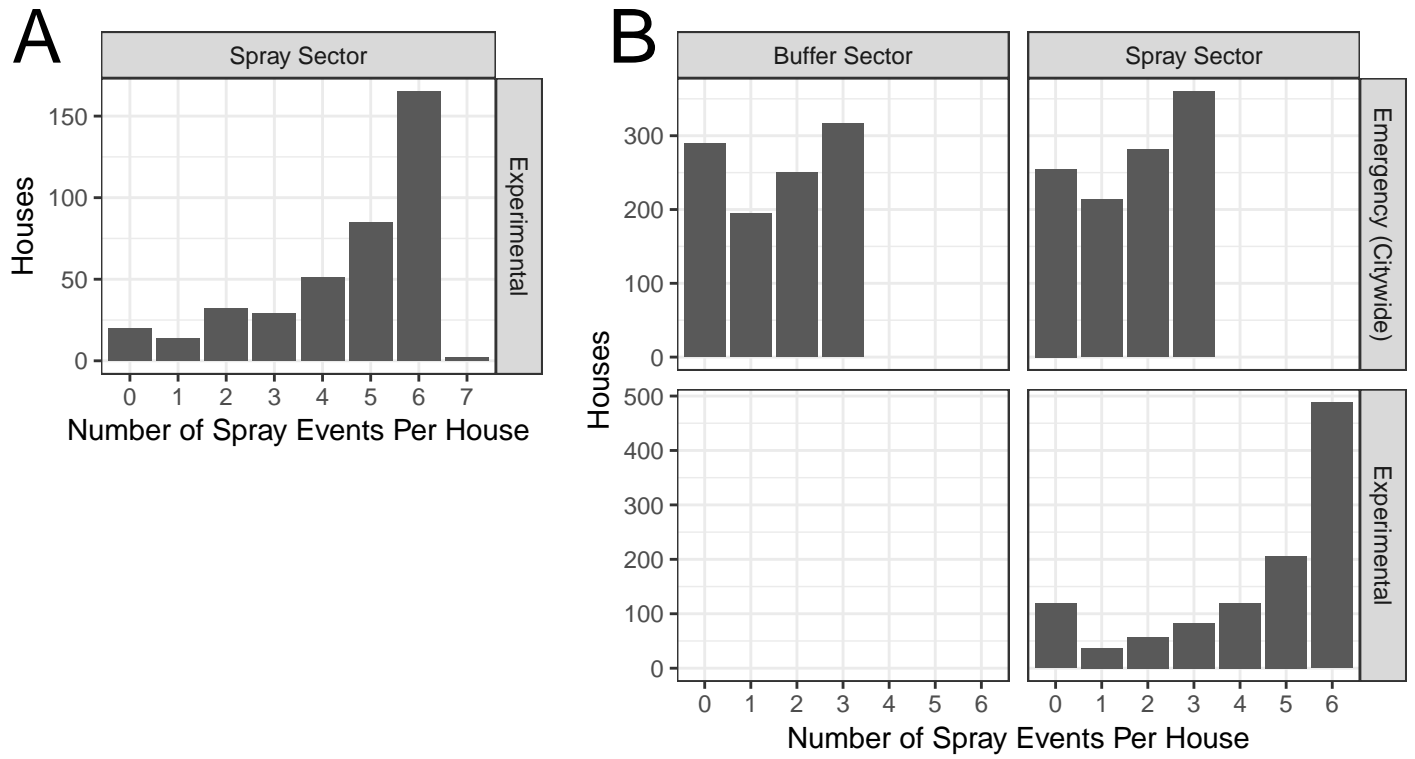

**Figure S2.** Summary of spray coverage in S-2013 (**A**) and L-2014 (**B**). In both years, most houses were sprayed in at least 5 out of 6 spray cycles, while a small number of houses were never sprayed. In L-2014, experimental spray coverage was much higher than emergency (citywide) spray coverage.

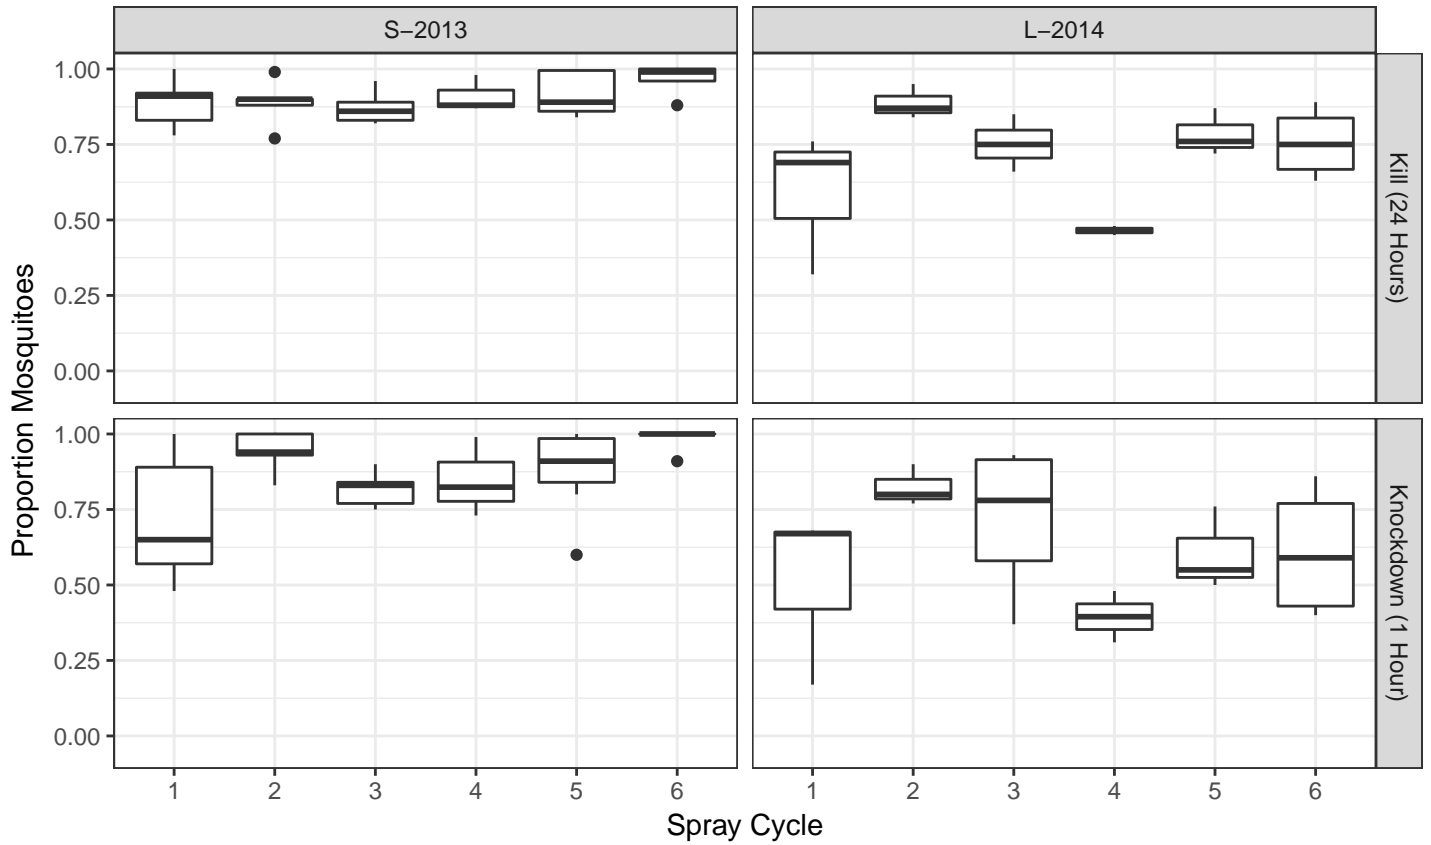

**Figure S3.** Boxplot of control cage house means: 25 adults per cage, 4 cages per house, approx 5 houses per spray cycle. Insects were from a laboratory colony (one colony per year).

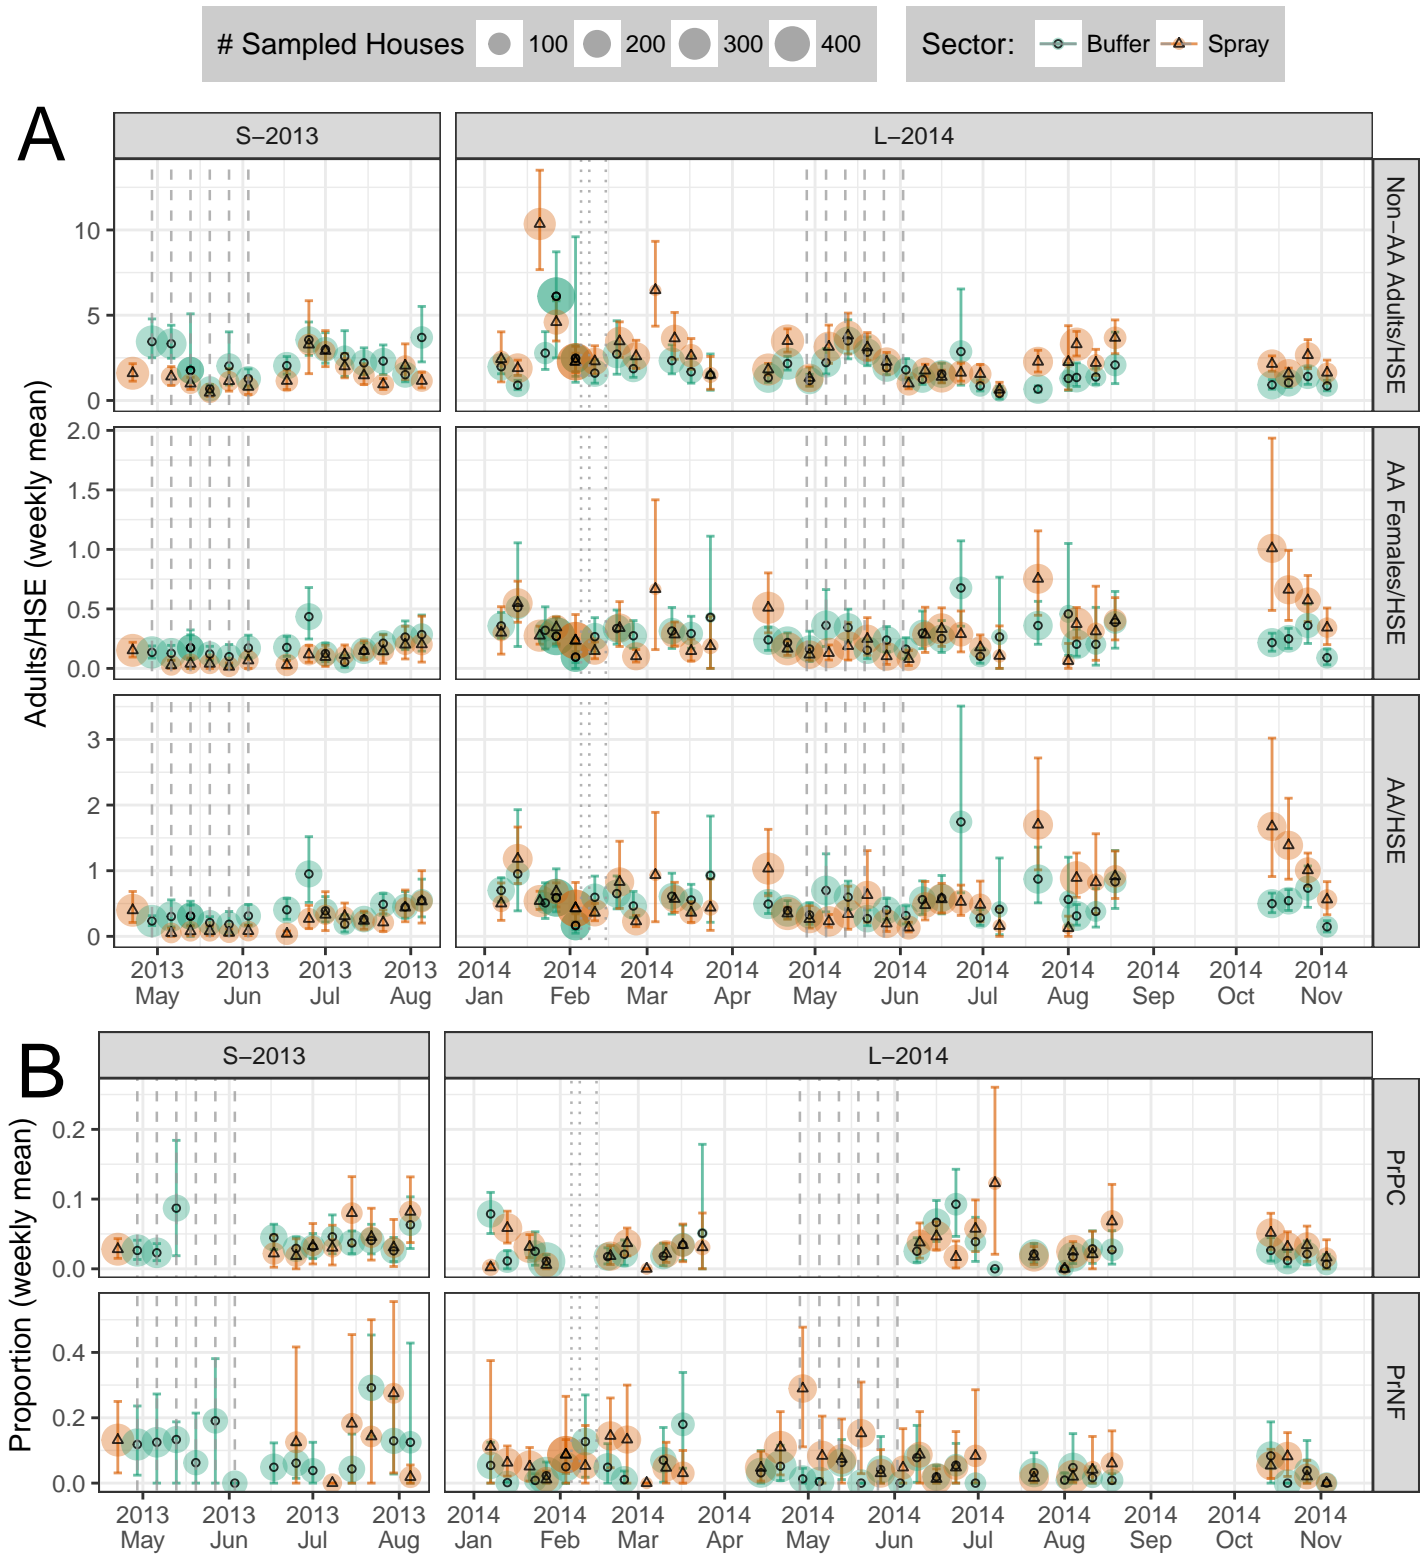

**Figure S4. Time series of survey results**, aggregated by week. X-axis shows week start date. Color and line-type shows treatment sector (orange triangle: Spray Sector). Point size shows number of surveyed houses. Vertical lines show approximate spray dates: dashed, experimental spraying (spray sector only); dotted, citywide spraying (Feb 2014, all sectors). Vertical colored bars show bootstrap 95% CI (1e+04 draws per circuit). **A:** Adult surveys. **B:** Container (PrPC) and parity (PrNF) surveys.

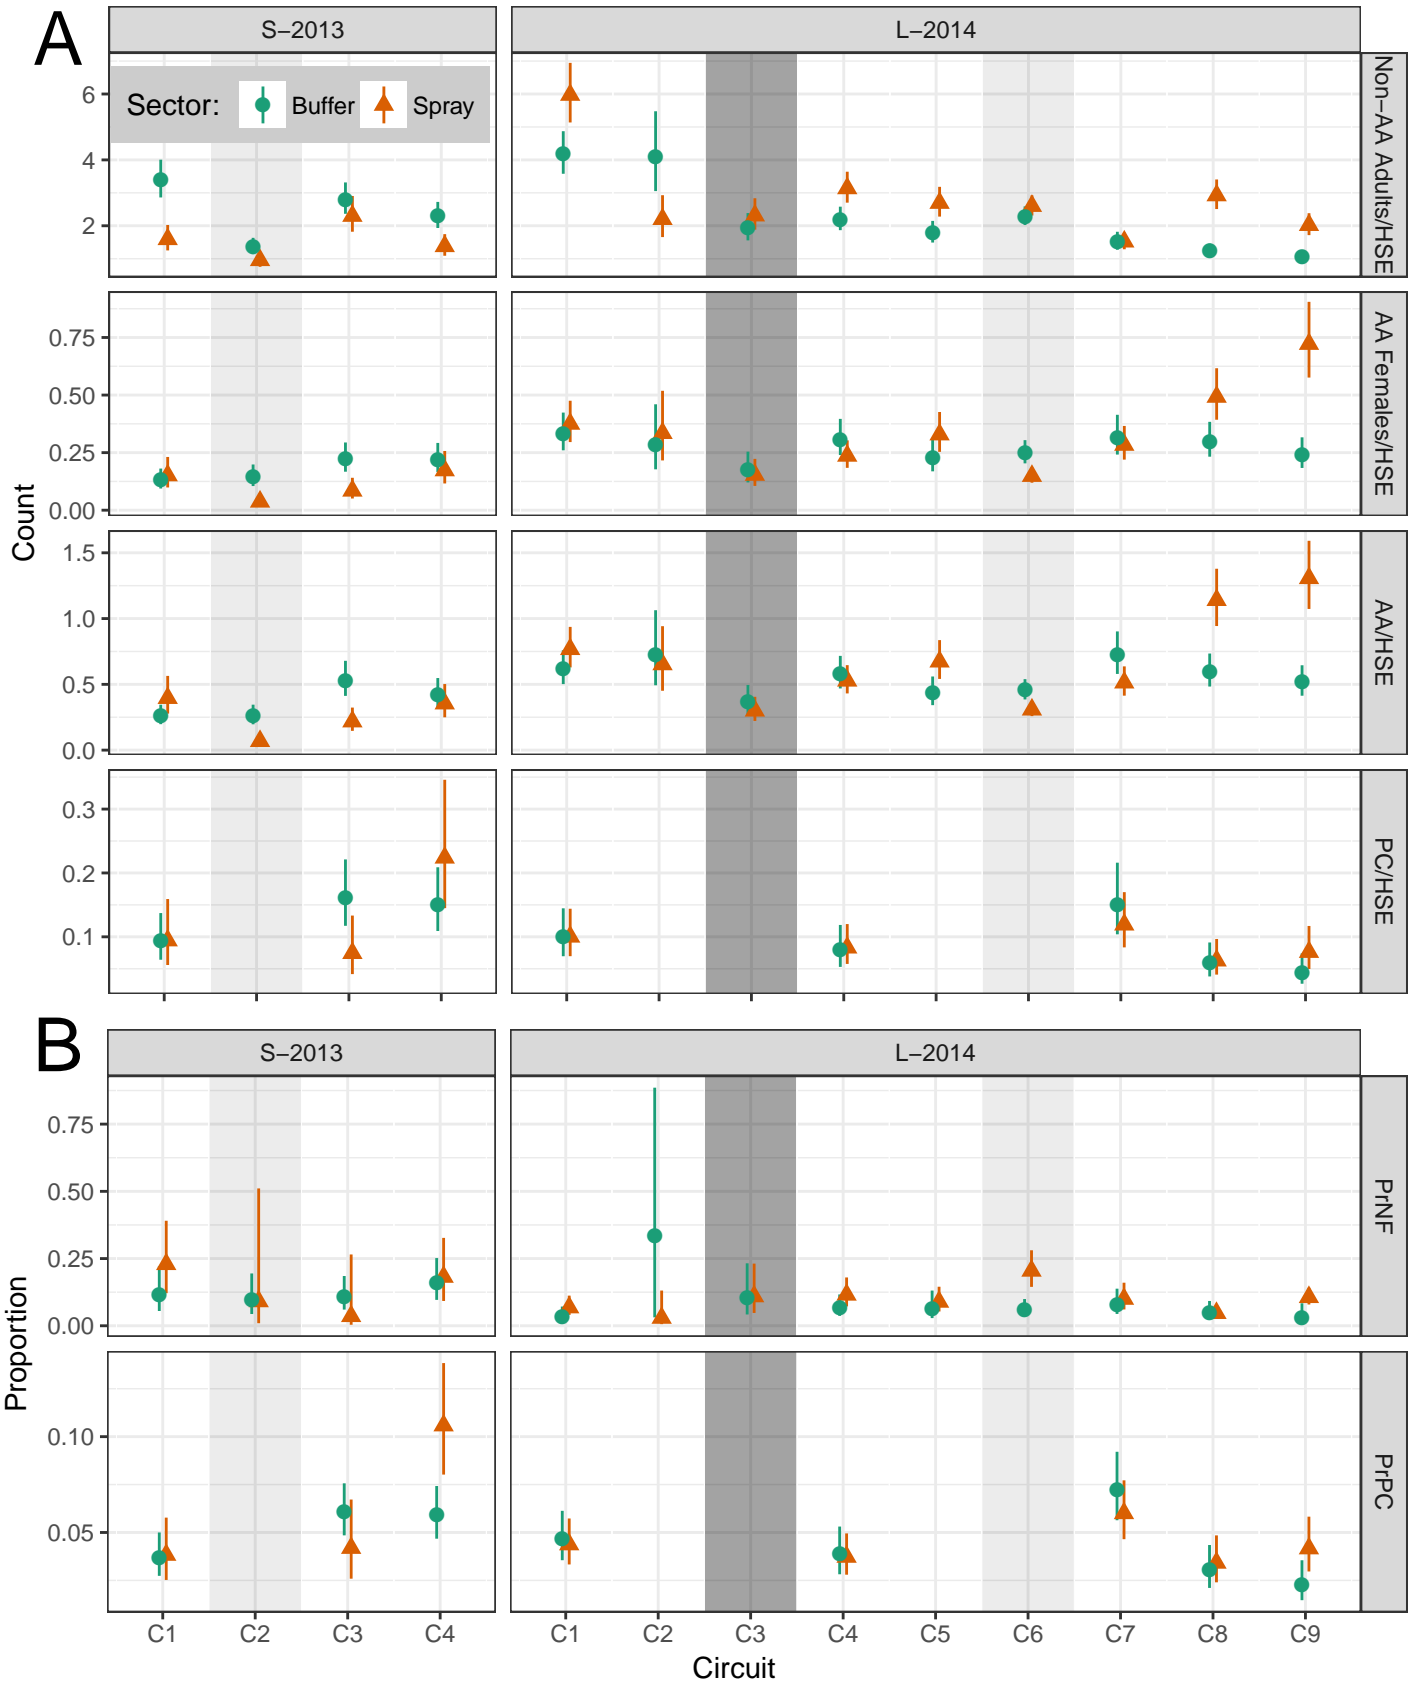

**Figure S5. Model results**, as in Fig. 4. All models include fixed effects of sector and circuit, with a separate model for each year. **A, Counts:** negative binomial GLM (NB-GLM). **B, Proportions:** logistic GLM (L-GLM). Breteau Index (BI) =  $100 \times \text{PC}/\text{HSE}$ . See also Tables S2-S10B.

| Experiment | Circuit | Weeks | Treatment      | Houses | Surveys | Full Surveys | Buffer | Spray |
|------------|---------|-------|----------------|--------|---------|--------------|--------|-------|
| S-2013     | C1      | 01-04 |                | 943    | 944     | 863          | 613    | 331   |
| S-2013     | C2      | 03-07 | Exper. spray   | 679    | 983     | 0            | 603    | 380   |
| S-2013     | C3      | 09-12 |                | 935    | 949     | 885          | 618    | 331   |
| S-2013     | C4      | 13-16 |                | 930    | 967     | 882          | 614    | 353   |
| L-2014     | C1      | 01-04 |                | 1470   | 1473    | 1289         | 729    | 744   |
| L-2014     | C2      | 04-05 |                | 430    | 430     | 0            | 203    | 227   |
| L-2014     | C3      | 05-06 | Citywide spray | 792    | 848     | 0            | 411    | 437   |
| L-2014     | C4      | 07-12 |                | 1452   | 1500    | 1359         | 704    | 796   |
| L-2014     | C5      | 15-16 |                | 1206   | 1212    | 0            | 567    | 645   |
| L-2014     | C6      | 17-21 | Exper. spray   | 1646   | 2502    | 0            | 1202   | 1300  |
| L-2014     | C7      | 22-27 |                | 1287   | 1319    | 1147         | 610    | 709   |
| L-2014     | C8      | 29-33 |                | 1461   | 1482    | 1267         | 720    | 762   |
| L-2014     | C9      | 41-44 |                | 1339   | 1358    | 1125         | 664    | 694   |

**Table S1. Observation counts by Circuit.** *Weeks*: Week number from experiment start. *Houses*: number of unique houses surveyed. *Surveys*: total surveys (either adult, or combined adult and immature). *Full Surveys*: surveys where both adult and immatures were surveyed. *Buffer, Spray*: surveys in buffer and spray sector, respectively.

| Experiment | Circuit | Weeks | Treatment      | Ratio | SE   | p.value         |
|------------|---------|-------|----------------|-------|------|-----------------|
| S-2013     | C1      | 01-04 |                | 1.52  | 0.31 | <b>0.0395</b>   |
| S-2013     | C2      | 03-07 | Exper. spray   | 0.26  | 0.07 | <b>4.16e-07</b> |
| S-2013     | C3      | 09-12 |                | 0.41  | 0.09 | <b>2.19e-05</b> |
| S-2013     | C4      | 13-16 |                | 0.84  | 0.16 | 0.357           |
| L-2014     | C1      | 01-04 |                | 1.24  | 0.16 | 0.09            |
| L-2014     | C2      | 04-05 |                | 0.90  | 0.21 | 0.659           |
| L-2014     | C3      | 05-06 | Citywide spray | 0.82  | 0.15 | 0.284           |
| L-2014     | C4      | 07-12 |                | 0.91  | 0.12 | 0.474           |
| L-2014     | C5      | 15-16 |                | 1.54  | 0.23 | <b>0.0034</b>   |
| L-2014     | C6      | 17-21 | Exper. spray   | 0.67  | 0.07 | <b>0.00028</b>  |
| L-2014     | C7      | 22-27 |                | 0.71  | 0.10 | <b>0.0132</b>   |
| L-2014     | C8      | 29-33 |                | 1.91  | 0.24 | <b>2.72e-07</b> |
| L-2014     | C9      | 41-44 |                | 2.53  | 0.34 | <b>2.67e-12</b> |

**Table S2. Comparison between sectors (within time):** Ratio of AA/HSE in spray sector relative to buffer sector (spray/buffer). **Bold p.values:** significant difference between sectors. In both years, the spray sector starts with more adults per house, and spraying reduces AA/HSE relative to buffer sectors. As in Table S3, the effects of spraying are most pronounced in 2013. See also Fig. 4A.

| Experiment | Circuit | Weeks | Treatment      | Ratio | SE   | p.value         |
|------------|---------|-------|----------------|-------|------|-----------------|
| S-2013     | C2      | 03-07 | Exper. spray   | 0.17  | 0.05 | <b>1.24e-09</b> |
| S-2013     | C3      | 09-12 |                | 0.55  | 0.13 | <b>0.0351</b>   |
| S-2013     | C4      | 13-16 |                | 0.89  | 0.20 | 0.944           |
| L-2014     | C2      | 04-05 |                | 0.85  | 0.16 | 0.979           |
| L-2014     | C3      | 05-06 | Citywide spray | 0.39  | 0.06 | <b>4.87e-08</b> |
| L-2014     | C4      | 07-12 |                | 0.69  | 0.09 | <b>0.0251</b>   |
| L-2014     | C5      | 15-16 |                | 0.88  | 0.12 | 0.954           |
| L-2014     | C6      | 17-21 | Exper. spray   | 0.40  | 0.05 | <b>8.97e-14</b> |
| L-2014     | C7      | 22-27 |                | 0.67  | 0.09 | <b>0.0173</b>   |
| L-2014     | C8      | 29-33 |                | 1.49  | 0.18 | <b>0.0103</b>   |
| L-2014     | C9      | 41-44 |                | 1.70  | 0.21 | <b>0.000172</b> |

**Table S3. Comparison between times (within spray sector):** Ratio of AA/HSE relative to baseline (C1, spray sector only). **Bold p.values:** significant difference from baseline circuit. In both years, spraying reduces AA/HSE relative to baseline (C1). The effects of spraying are most pronounced in S-2013, but are short-lived in both years. See also Fig. 4A.



| Experiment | Contrast                     | Ratio | SE   | p.value       |
|------------|------------------------------|-------|------|---------------|
| S-2013     | No Prior Spray / Prior Spray | 1.58  | 1.11 | 0.764         |
| L-2014     | No Prior Spray / Prior Spray | 2.01  | 0.62 | <b>0.0472</b> |
| L-2014     | Timing Unclear / Prior Spray | 0.71  | 0.26 | 0.566         |

**Table S4. Comparison between spray status (whether house was sprayed prior to survey):** Ratio of AA/HSE in houses that were either sprayed or not spray prior to surveying (no prior spray / prior spray). **Bold p.values:** In L-2014, houses without prior spraying yielded significantly more adults than houses with prior spraying. In S-2013, most houses were sprayed in the prior week. In L-2014, the exact date of spraying was uncertain for a small number of houses. See Table S5 for details.

| Experiment | Spray.status   | nObs | Group     | Est  | SE   | 95% CI    |
|------------|----------------|------|-----------|------|------|-----------|
| S-2013     | Prior Spray    | 311  | <b>b</b>  | 0.06 | 0.02 | 0.03-0.14 |
| S-2013     | No Prior Spray | 59   | <b>ab</b> | 0.10 | 0.06 | 0.02-0.54 |
| L-2014     | Prior Spray    | 889  | <b>a</b>  | 0.28 | 0.04 | 0.19-0.40 |
| L-2014     | No Prior Spray | 205  | <b>a</b>  | 0.56 | 0.15 | 0.27-1.15 |
| L-2014     | Timing Unclear | 164  | <b>ab</b> | 0.20 | 0.07 | 0.08-0.48 |

**Table S5. Effect of prior spray on AA/HSE.** A single model (NB-GLM) includes both experiment year and spray status as predictors. *Group:* significance groups (Tukey HSD) compare among all rows. Only house surveys in the spray sector during experimental spraying are included (i.e., S-2013 C2 and L-2014 C6). Not all sprayed houses were subsequently surveyed. The average interval between each house’s spray application and survey was shorter in L-2014 (median 2 days) than S-2013 (median 7 days). See also Table S4.

| Circuit | Weeks | Treatment    | Sector | nObs | Group | Est  | SE   | 95% CI    |
|---------|-------|--------------|--------|------|-------|------|------|-----------|
| C1      | 01-04 |              | Buffer | 613  | ab    | 0.26 | 0.03 | 0.19-0.37 |
| C2      | 03-07 |              | Buffer | 603  | ab    | 0.26 | 0.03 | 0.18-0.37 |
| C3      | 09-12 |              | Buffer | 618  | c     | 0.53 | 0.06 | 0.39-0.72 |
| C4      | 13-16 |              | Buffer | 614  | a c   | 0.42 | 0.05 | 0.31-0.58 |
| C1      | 01-04 |              | Spray  | 331  | abc   | 0.40 | 0.06 | 0.26-0.61 |
| C2      | 03-07 | Exper. spray | Spray  | 380  | d     | 0.07 | 0.02 | 0.04-0.13 |
| C3      | 09-12 |              | Spray  | 331  | b     | 0.22 | 0.04 | 0.13-0.35 |
| C4      | 13-16 |              | Spray  | 353  | abc   | 0.35 | 0.06 | 0.23-0.54 |

**Table S6A. *Ae. aegypti* adults per house (AA/HSE), 2013.** Model estimates by circuit and treatment sector. Horizontal line separates treatment sectors; significance groups (Tukey HSD) compare among all rows. See Fig. 4A for model description.

| Circuit | Weeks | Treatment      | Sector | nObs | Group  | Est  | SE   | 95% CI    |
|---------|-------|----------------|--------|------|--------|------|------|-----------|
| C1      | 01-04 |                | Buffer | 729  | abcd   | 0.62 | 0.06 | 0.47-0.81 |
| C2      | 04-05 |                | Buffer | 203  | abcdef | 0.72 | 0.12 | 0.43-1.21 |
| C3      | 05-06 | Citywide spray | Buffer | 411  | a gh   | 0.37 | 0.05 | 0.25-0.55 |
| C4      | 07-12 |                | Buffer | 704  | abcd   | 0.58 | 0.05 | 0.44-0.77 |
| C5      | 15-16 |                | Buffer | 567  | abc gh | 0.44 | 0.05 | 0.31-0.61 |
| C6      | 17-21 |                | Buffer | 1202 | a c g  | 0.46 | 0.03 | 0.36-0.57 |
| C7      | 22-27 |                | Buffer | 610  | b d    | 0.72 | 0.07 | 0.54-0.97 |
| C8      | 29-33 |                | Buffer | 720  | abcd   | 0.60 | 0.06 | 0.45-0.79 |
| C9      | 41-44 |                | Buffer | 664  | abcd g | 0.52 | 0.05 | 0.38-0.69 |
| C1      | 01-04 |                | Spray  | 744  | de     | 0.77 | 0.07 | 0.59-1.00 |
| C2      | 04-05 |                | Spray  | 227  | abcde  | 0.65 | 0.11 | 0.40-1.07 |
| C3      | 05-06 | Citywide spray | Spray  | 437  | gh     | 0.30 | 0.04 | 0.20-0.45 |
| C4      | 07-12 |                | Spray  | 796  | abcd g | 0.53 | 0.05 | 0.40-0.69 |
| C5      | 15-16 |                | Spray  | 645  | bcd    | 0.67 | 0.07 | 0.50-0.90 |
| C6      | 17-21 | Exper. spray   | Spray  | 1300 | h      | 0.31 | 0.02 | 0.24-0.39 |
| C7      | 22-27 |                | Spray  | 709  | abcd g | 0.51 | 0.05 | 0.39-0.68 |
| C8      | 29-33 |                | Spray  | 762  | ef     | 1.14 | 0.10 | 0.89-1.47 |
| C9      | 41-44 |                | Spray  | 694  | f      | 1.31 | 0.12 | 1.01-1.70 |

**Table S6B. *Ae. aegypti* adults per house (AA/HSE), 2014.** See Table S6A for details.

| Circuit | Weeks | Treatment    | Sector | nObs | Group | Est  | SE   | 95% CI    |
|---------|-------|--------------|--------|------|-------|------|------|-----------|
| C1      | 01-04 |              | Buffer | 613  | ab    | 0.15 | 0.01 | 0.11-0.19 |
| C2      | 03-07 |              | Buffer | 603  | ab    | 0.15 | 0.01 | 0.11-0.19 |
| C3      | 09-12 |              | Buffer | 618  | a c   | 0.21 | 0.02 | 0.17-0.26 |
| C4      | 13-16 |              | Buffer | 614  | c     | 0.23 | 0.02 | 0.19-0.28 |
| C1      | 01-04 |              | Spray  | 331  | abc   | 0.16 | 0.02 | 0.11-0.22 |
| C2      | 03-07 | Exper. spray | Spray  | 380  | d     | 0.06 | 0.01 | 0.03-0.10 |
| C3      | 09-12 |              | Spray  | 331  | b     | 0.13 | 0.02 | 0.08-0.19 |
| C4      | 13-16 |              | Spray  | 353  | abc   | 0.17 | 0.02 | 0.12-0.23 |

**Table S7A. Proportion *Ae. aegypti* adult-infested houses (PrIH), 2013.** Model estimates by circuit and treatment sector. Horizontal line separates treatment sectors; significance groups (Tukey HSD) compare among all rows. See Fig. 4B for model description.

| Circuit | Weeks | Treatment      | Sector | nObs | Group  | Est  | SE   | 95% CI    |
|---------|-------|----------------|--------|------|--------|------|------|-----------|
| C1      | 01-04 |                | Buffer | 729  | ab     | 0.31 | 0.02 | 0.26-0.36 |
| C2      | 04-05 |                | Buffer | 203  | abcd   | 0.33 | 0.03 | 0.24-0.43 |
| C3      | 05-06 | Citywide spray | Buffer | 411  | ef     | 0.16 | 0.02 | 0.11-0.22 |
| C4      | 07-12 |                | Buffer | 704  | abc g  | 0.26 | 0.02 | 0.22-0.32 |
| C5      | 15-16 |                | Buffer | 567  | c e g  | 0.22 | 0.02 | 0.17-0.28 |
| C6      | 17-21 |                | Buffer | 1202 | c e g  | 0.21 | 0.01 | 0.18-0.25 |
| C7      | 22-27 |                | Buffer | 610  | abc g  | 0.27 | 0.02 | 0.22-0.33 |
| C8      | 29-33 |                | Buffer | 720  | c e g  | 0.22 | 0.02 | 0.18-0.27 |
| C9      | 41-44 |                | Buffer | 664  | abc g  | 0.26 | 0.02 | 0.21-0.32 |
| C1      | 01-04 |                | Spray  | 744  | a d    | 0.34 | 0.02 | 0.29-0.39 |
| C2      | 04-05 |                | Spray  | 227  | abcd g | 0.29 | 0.03 | 0.21-0.39 |
| C3      | 05-06 | Citywide spray | Spray  | 437  | e g    | 0.18 | 0.02 | 0.13-0.24 |
| C4      | 07-12 |                | Spray  | 796  | bc e g | 0.23 | 0.01 | 0.19-0.28 |
| C5      | 15-16 |                | Spray  | 645  | abc    | 0.28 | 0.02 | 0.23-0.33 |
| C6      | 17-21 | Exper. spray   | Spray  | 1300 | f      | 0.11 | 0.01 | 0.09-0.14 |
| C7      | 22-27 |                | Spray  | 709  | c e g  | 0.22 | 0.02 | 0.18-0.27 |
| C8      | 29-33 |                | Spray  | 762  | a d    | 0.34 | 0.02 | 0.29-0.40 |
| C9      | 41-44 |                | Spray  | 694  | d      | 0.41 | 0.02 | 0.36-0.47 |

**Table S7B. Proportion *Ae. aegypti* adult-infested houses (PrIH), 2014.** See Table S7A for details.

| Circuit | Weeks | Treatment    | Sector | nObs | Group | Est  | SE   | 95% CI    |
|---------|-------|--------------|--------|------|-------|------|------|-----------|
| C1      | 01-04 |              | Buffer | 58   | a     | 0.11 | 0.04 | 0.05-0.25 |
| C2      | 03-07 |              | Buffer | 52   | a     | 0.10 | 0.03 | 0.04-0.22 |
| C3      | 09-12 |              | Buffer | 73   | a     | 0.11 | 0.03 | 0.05-0.21 |
| C4      | 13-16 |              | Buffer | 92   | a     | 0.16 | 0.03 | 0.09-0.28 |
| C1      | 01-04 | Exper. spray | Spray  | 32   | a     | 0.23 | 0.06 | 0.10-0.43 |
| C2      | 03-07 |              | Spray  | 9    | a     | 0.09 | 0.09 | 0.01-0.64 |
| C3      | 09-12 |              | Spray  | 23   | a     | 0.04 | 0.04 | 0.00-0.37 |
| C4      | 13-16 |              | Spray  | 34   | a     | 0.18 | 0.05 | 0.08-0.37 |

**Table S8A. Proportion nulliparouous *Ae. aegypti* females (PrNF), 2013.** Model estimates by circuit and treatment sector. Horizontal line separates treatment sectors; significance groups (Tukey HSD) compare among all rows. See also Fig. S5.

| Circuit | Weeks | Treatment      | Sector | nObs | Group | Est  | SE   | 95% CI    |
|---------|-------|----------------|--------|------|-------|------|------|-----------|
| C1      | 01-04 | Citywide spray | Buffer | 144  | a     | 0.03 | 0.01 | 0.01-0.09 |
| C2      | 04-05 |                | Buffer | 3    | ab    | 0.33 | 0.27 | 0.01-0.95 |
| C3      | 05-06 |                | Buffer | 39   | ab    | 0.10 | 0.04 | 0.03-0.29 |
| C4      | 07-12 |                | Buffer | 120  | a     | 0.07 | 0.02 | 0.03-0.14 |
| C5      | 15-16 |                | Buffer | 76   | ab    | 0.06 | 0.02 | 0.02-0.17 |
| C6      | 17-21 |                | Buffer | 155  | a     | 0.06 | 0.01 | 0.03-0.12 |
| C7      | 22-27 |                | Buffer | 93   | ab    | 0.08 | 0.02 | 0.04-0.16 |
| C8      | 29-33 |                | Buffer | 95   | a     | 0.05 | 0.01 | 0.02-0.11 |
| C9      | 41-44 |                | Buffer | 93   | a     | 0.03 | 0.01 | 0.01-0.12 |
| C1      | 01-04 | Exper. spray   | Spray  | 155  | a     | 0.07 | 0.02 | 0.03-0.13 |
| C2      | 04-05 |                | Spray  | 39   | ab    | 0.03 | 0.02 | 0.00-0.21 |
| C3      | 05-06 |                | Spray  | 47   | ab    | 0.11 | 0.04 | 0.04-0.29 |
| C4      | 07-12 |                | Spray  | 106  | ab    | 0.12 | 0.02 | 0.06-0.21 |
| C5      | 15-16 |                | Spray  | 101  | ab    | 0.09 | 0.02 | 0.04-0.17 |
| C6      | 17-21 |                | Spray  | 95   | b     | 0.20 | 0.03 | 0.13-0.31 |
| C7      | 22-27 |                | Spray  | 96   | ab    | 0.10 | 0.02 | 0.05-0.19 |
| C8      | 29-33 |                | Spray  | 161  | a     | 0.05 | 0.01 | 0.02-0.09 |
| C9      | 41-44 |                | Spray  | 197  | ab    | 0.11 | 0.01 | 0.07-0.16 |

**Table S8B. Proportion nulliparouous *Ae. aegypti* females (PrNF), 2014.** See Table S8A for details.

| Circuit | Weeks | Sector | nObs | Group | Est  | SE   | 95% CI      |
|---------|-------|--------|------|-------|------|------|-------------|
| C1      | 01-04 | Buffer | 565  | a     | 0.09 | 0.02 | 0.060-0.147 |
| C3      | 09-12 | Buffer | 590  | ab    | 0.16 | 0.02 | 0.111-0.234 |
| C4      | 13-16 | Buffer | 583  | ab    | 0.15 | 0.02 | 0.103-0.221 |
| C1      | 01-04 | Spray  | 297  | ab    | 0.09 | 0.02 | 0.051-0.175 |
| C3      | 09-12 | Spray  | 282  | a     | 0.07 | 0.02 | 0.038-0.148 |
| C4      | 13-16 | Spray  | 268  | b     | 0.22 | 0.04 | 0.134-0.373 |

**Table S9A. *Ae. aegypti* Positive Containers per House (PC/HSE), 2013.** Breteau index (BI) =  $100 \times \text{PC}/\text{HSE}$ . Model estimates by circuit and treatment sector. Horizontal line separates treatment sectors; significance groups (Tukey HSD) compare among all rows. No container surveys were conducted during spraying. See also Fig. S5.

| Circuit | Weeks | Sector | nObs | Group | Est  | SE   | 95% CI      |
|---------|-------|--------|------|-------|------|------|-------------|
| C1      | 01-04 | Buffer | 638  | abc   | 0.10 | 0.02 | 0.063-0.159 |
| C4      | 07-12 | Buffer | 606  | abc   | 0.08 | 0.01 | 0.048-0.131 |
| C7      | 22-27 | Buffer | 514  | a     | 0.15 | 0.02 | 0.095-0.237 |
| C8      | 29-33 | Buffer | 629  | bc    | 0.06 | 0.01 | 0.034-0.102 |
| C9      | 41-44 | Buffer | 564  | b     | 0.04 | 0.01 | 0.023-0.084 |
| C1      | 01-04 | Spray  | 649  | abc   | 0.10 | 0.02 | 0.064-0.158 |
| C4      | 07-12 | Spray  | 710  | abc   | 0.08 | 0.01 | 0.052-0.132 |
| C7      | 22-27 | Spray  | 613  | a c   | 0.12 | 0.02 | 0.076-0.186 |
| C8      | 29-33 | Spray  | 621  | bc    | 0.06 | 0.01 | 0.037-0.108 |
| C9      | 41-44 | Spray  | 551  | abc   | 0.08 | 0.01 | 0.045-0.130 |

**Table S9B. *Ae. aegypti* Positive Containers per House (PC/HSE), 2014.** Breteau index (BI) =  $100 \times \text{PC}/\text{HSE}$ . See Table S9A for details.

| Circuit | Weeks | Sector | nObs | Group | Est  | SE   | 95% CI      |
|---------|-------|--------|------|-------|------|------|-------------|
| C1      | 01-04 | Buffer | 565  | a     | 0.04 | 0.00 | 0.026-0.053 |
| C3      | 09-12 | Buffer | 590  | b     | 0.06 | 0.01 | 0.047-0.079 |
| C4      | 13-16 | Buffer | 583  | ab    | 0.06 | 0.01 | 0.045-0.077 |
| C1      | 01-04 | Spray  | 297  | ab    | 0.04 | 0.01 | 0.023-0.062 |
| C3      | 09-12 | Spray  | 282  | ab    | 0.04 | 0.01 | 0.024-0.073 |
| C4      | 13-16 | Spray  | 268  | c     | 0.11 | 0.01 | 0.076-0.145 |

**Table S10A. Proportion *Ae. aegypti* Positive Containers (PrPC), 2013.** Model estimates by circuit and treatment sector. Horizontal line separates treatment sectors; significance groups (Tukey HSD) compare among all rows. No container surveys were conducted during spraying. See also Fig. S5.

| Circuit | Weeks | Sector | nObs | Group | Est  | SE   | 95% CI      |
|---------|-------|--------|------|-------|------|------|-------------|
| C1      | 01-04 | Buffer | 638  | abc   | 0.05 | 0.01 | 0.033-0.066 |
| C4      | 07-12 | Buffer | 606  | ab    | 0.04 | 0.01 | 0.026-0.057 |
| C7      | 22-27 | Buffer | 514  | c     | 0.07 | 0.01 | 0.053-0.098 |
| C8      | 29-33 | Buffer | 629  | a     | 0.03 | 0.00 | 0.019-0.048 |
| C9      | 41-44 | Buffer | 564  | a     | 0.02 | 0.00 | 0.013-0.040 |
| C1      | 01-04 | Spray  | 649  | abc   | 0.04 | 0.01 | 0.031-0.061 |
| C4      | 07-12 | Spray  | 710  | ab    | 0.04 | 0.00 | 0.026-0.053 |
| C7      | 22-27 | Spray  | 613  | bc    | 0.06 | 0.01 | 0.044-0.082 |
| C8      | 29-33 | Spray  | 621  | ab    | 0.03 | 0.01 | 0.022-0.053 |
| C9      | 41-44 | Spray  | 551  | abc   | 0.04 | 0.01 | 0.027-0.063 |

**Table S10B. Proportion *Ae. aegypti* Positive Containers (PrPC), 2014.** See Table S10A for details.

Sector: ■ Buffer ■ Spray ■ Not Surveyed

Sector: ■ Buffer ■ Spray ■ Not Surveyed

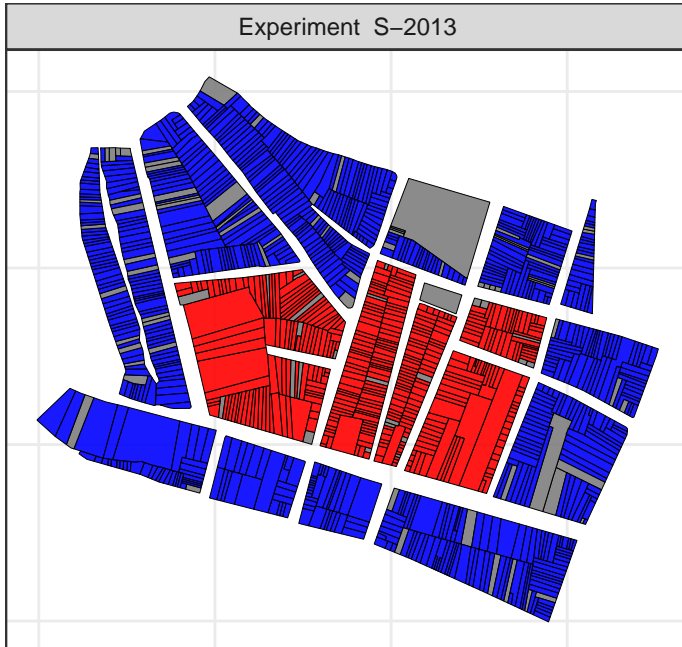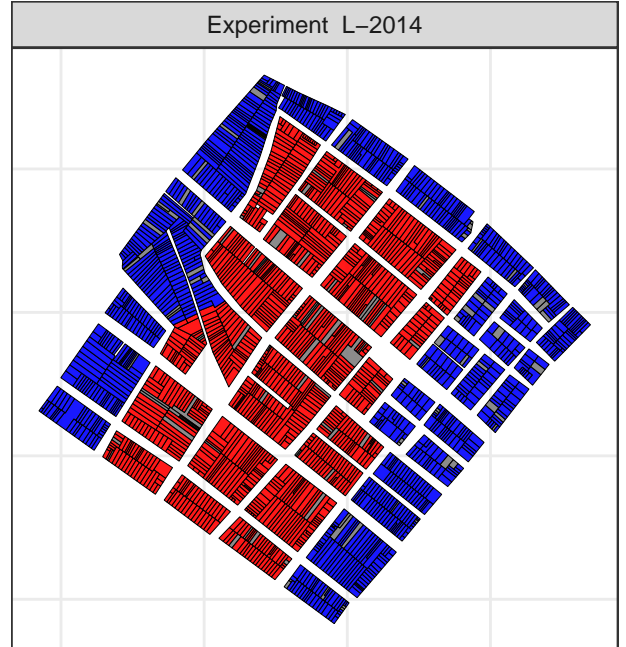

Sector: ■ Buffer ■ Spray ■ Not Surveyed

Sector: ■ Buffer ■ Spray ■ Not Surveyed

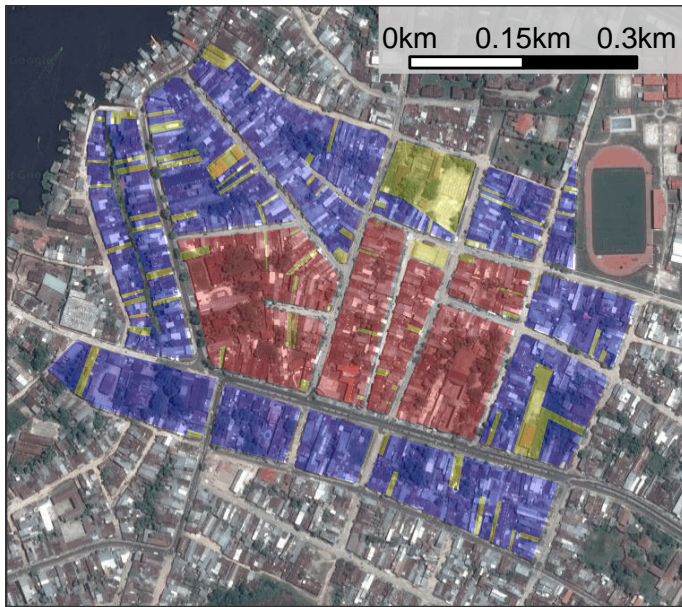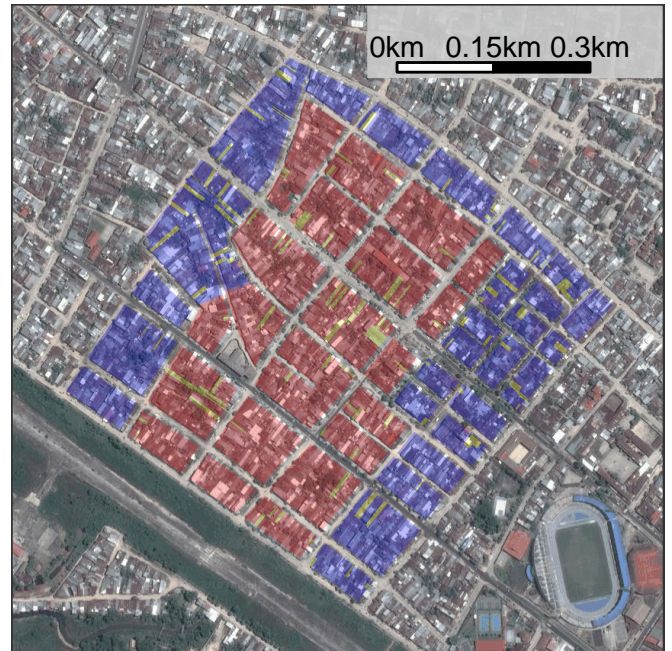

**Figure S6.** Maps of experimental areas, showing satellite imagery. Note the scale differs between experiments. See also Fig. 1.

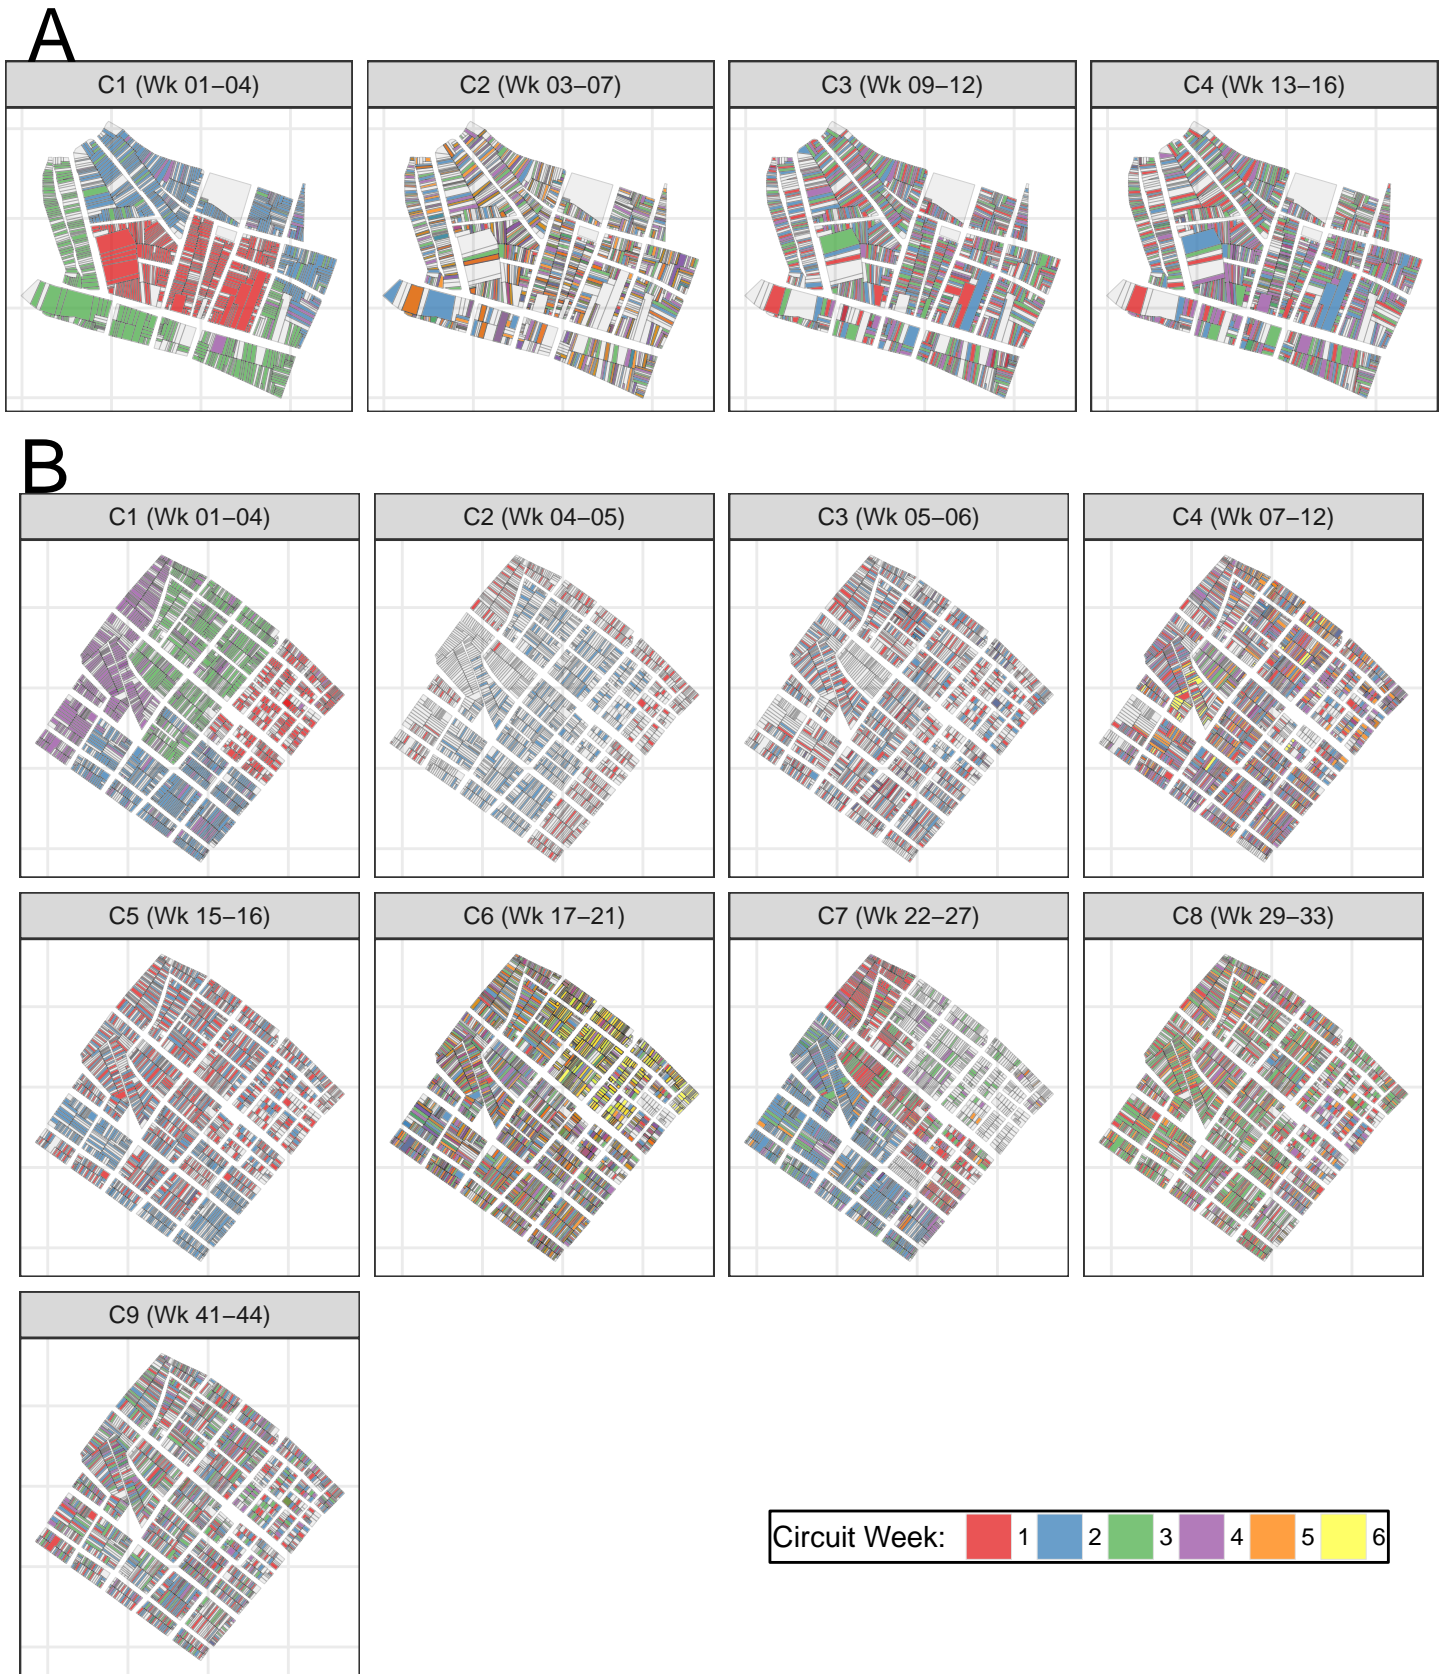

**Figure S7.** Maps showing survey locations by circuit (panel) and week within circuit (color). **A:** S-2013. **B:** L-2014.



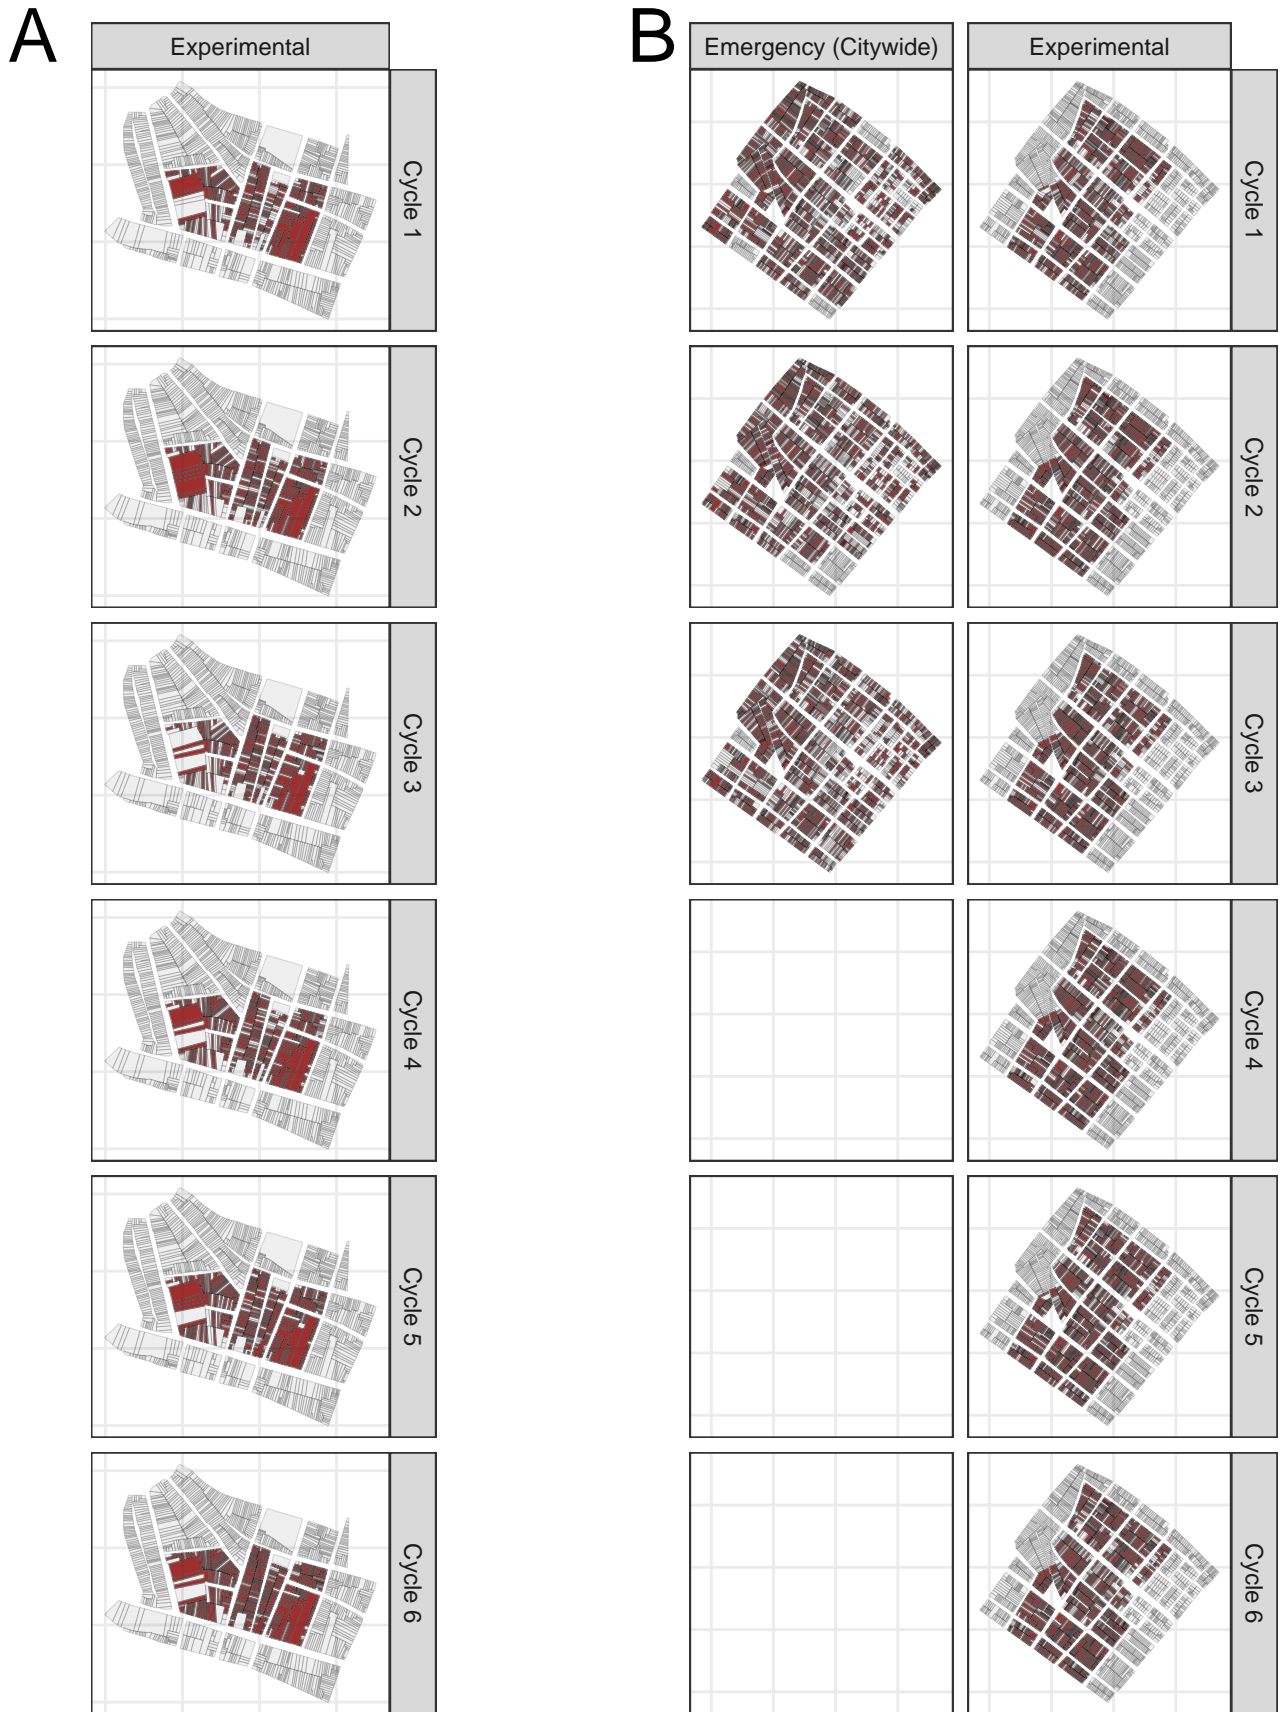

**Figure S8.** Maps of spray events (red) by spray cycle (rows). **A:** S-2013. **B:** L-2014. During L-2014, in addition to experimental spraying, 3 cycles of emergency citywide spraying were conducted. Note the map scale differs between **A** and **B**. See also Fig. 1. S16
