# Supplementary material for: Efficacy of Aedes aegypti control by indoor Ultra Low Volume (ULV) insecticide spraying in Iquitos, Peru
Source: PubMed Central journal article supplement (PMC5906025; doi:10.1371/journal.pntd.0006378), 2018-04-06
Supplement: pntd.0006378.s003.pdf [file pntd.0006378.s003.pdf]

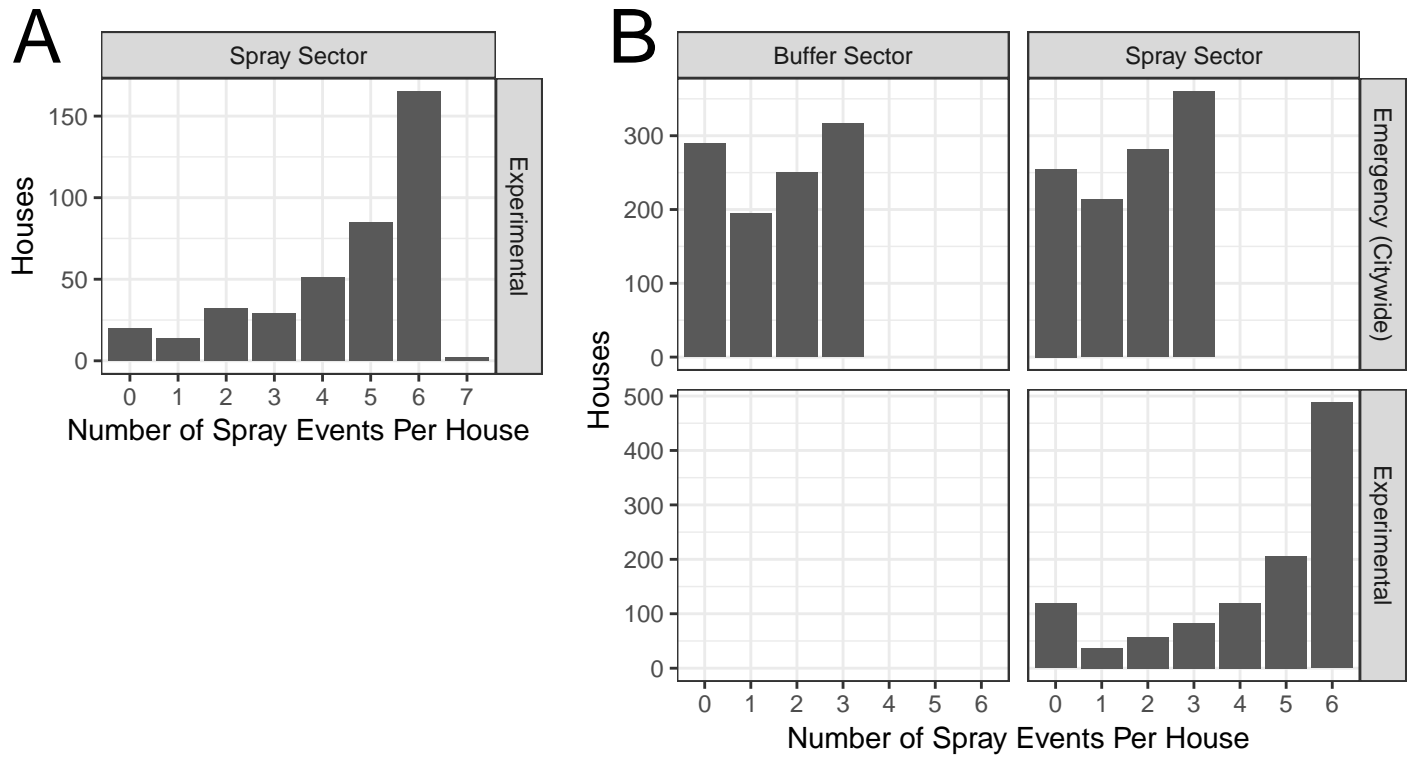

**Figure S2.** Summary of spray coverage in S-2013 (**A**) and L-2014 (**B**). In both years, most houses were sprayed in at least 5 out of 6 spray cycles, while a small number of houses were never sprayed. In L-2014, experimental spray coverage was much higher than emergency (citywide) spray coverage.
