# Supplementary material for: Efficacy of Aedes aegypti control by indoor Ultra Low Volume (ULV) insecticide spraying in Iquitos, Peru
Source: PubMed Central journal article supplement (PMC5906025; doi:10.1371/journal.pntd.0006378), 2018-04-06
Supplement: pntd.0006378.s005.pdf [file pntd.0006378.s005.pdf]

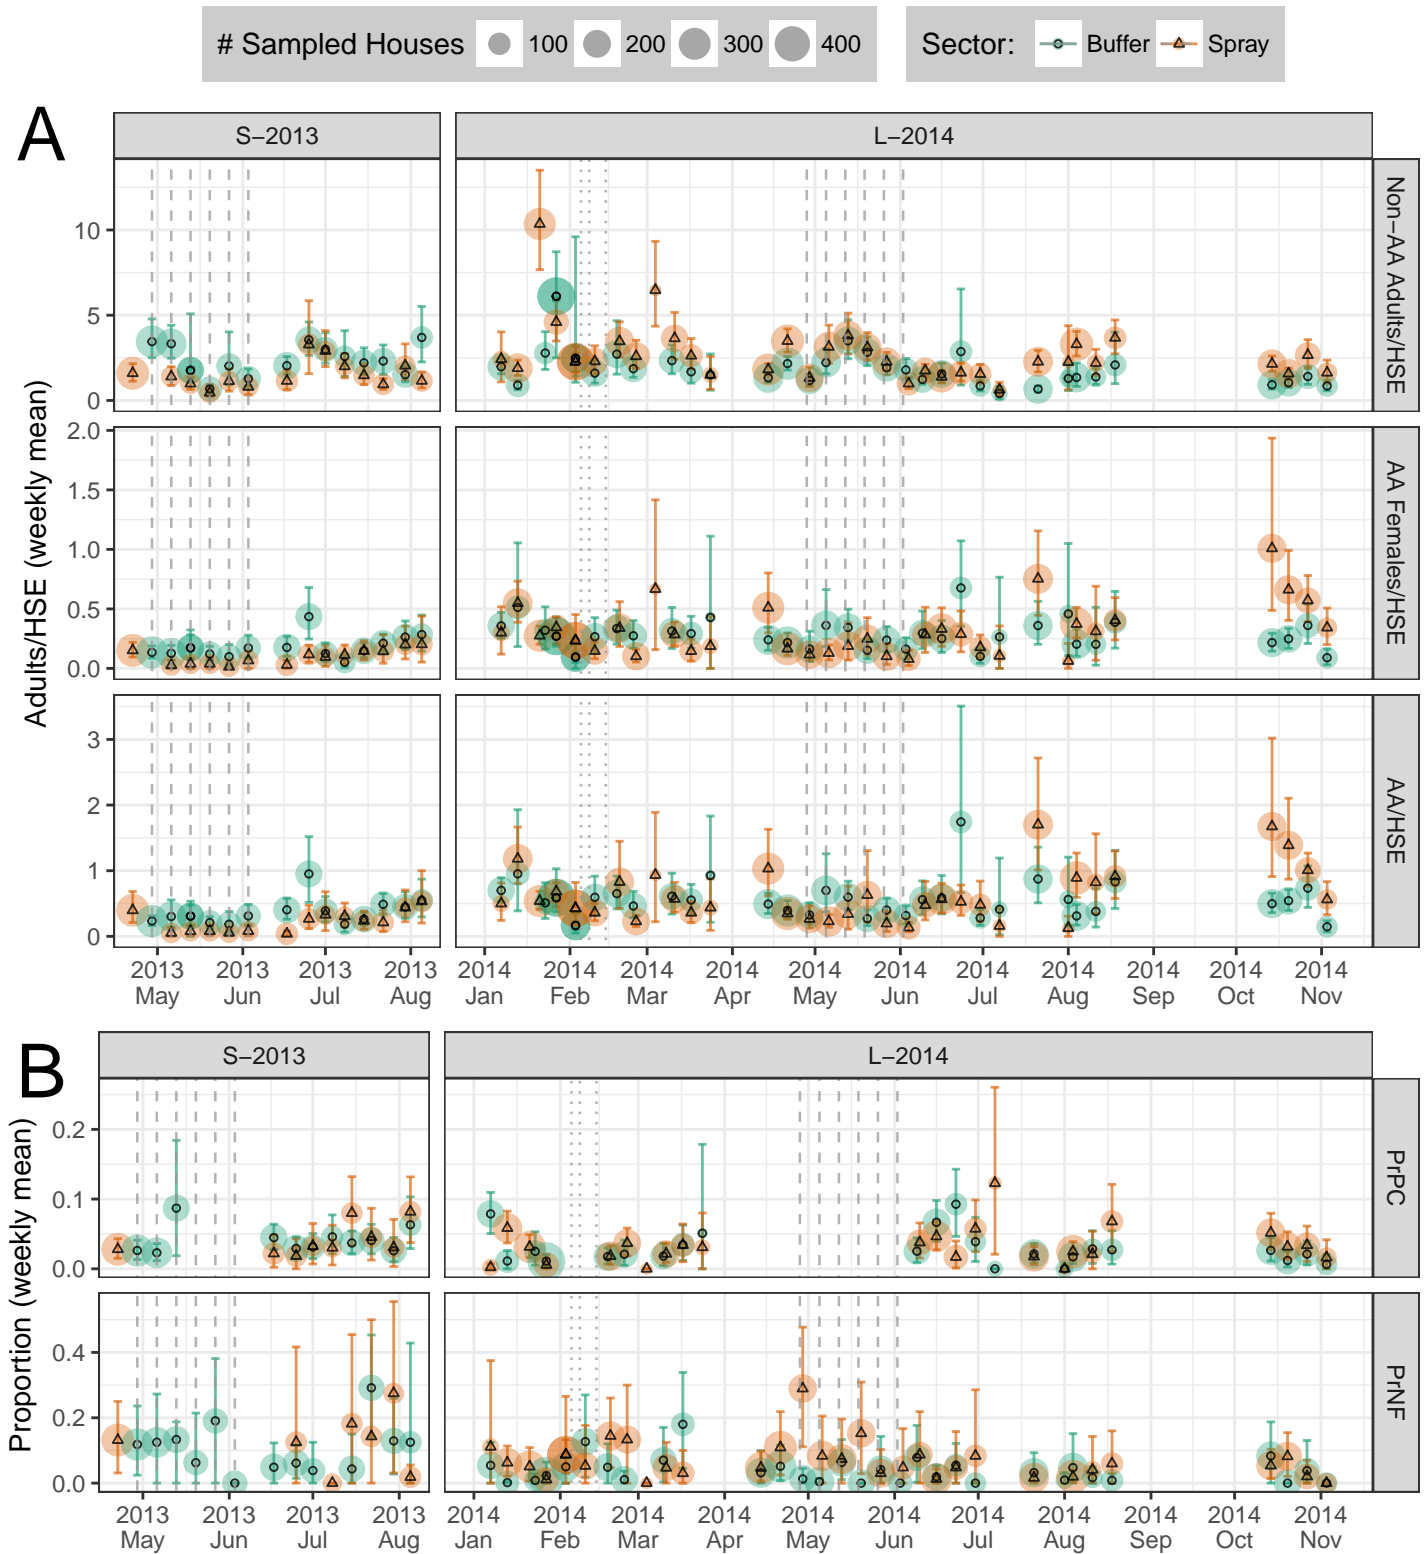

**Figure S4. Time series of survey results**, aggregated by week. X-axis shows week start date. Color and line-type shows treatment sector (orange triangle: Spray Sector). Point size shows number of surveyed houses. Vertical lines show approximate spray dates: dashed, experimental spraying (spray sector only); dotted, citywide spraying (Feb 2014, all sectors). Vertical colored bars show bootstrap 95% CI ( $1e+04$  draws per circuit). **A:** Adult surveys. **B:** Container (PrPC) and parity (PrNF) surveys.
