# Supplementary material for: Efficacy of Aedes aegypti control by indoor Ultra Low Volume (ULV) insecticide spraying in Iquitos, Peru
Source: PubMed Central journal article supplement (PMC5906025; doi:10.1371/journal.pntd.0006378), 2018-04-06
Supplement: pntd.0006378.s006.pdf [file pntd.0006378.s006.pdf]

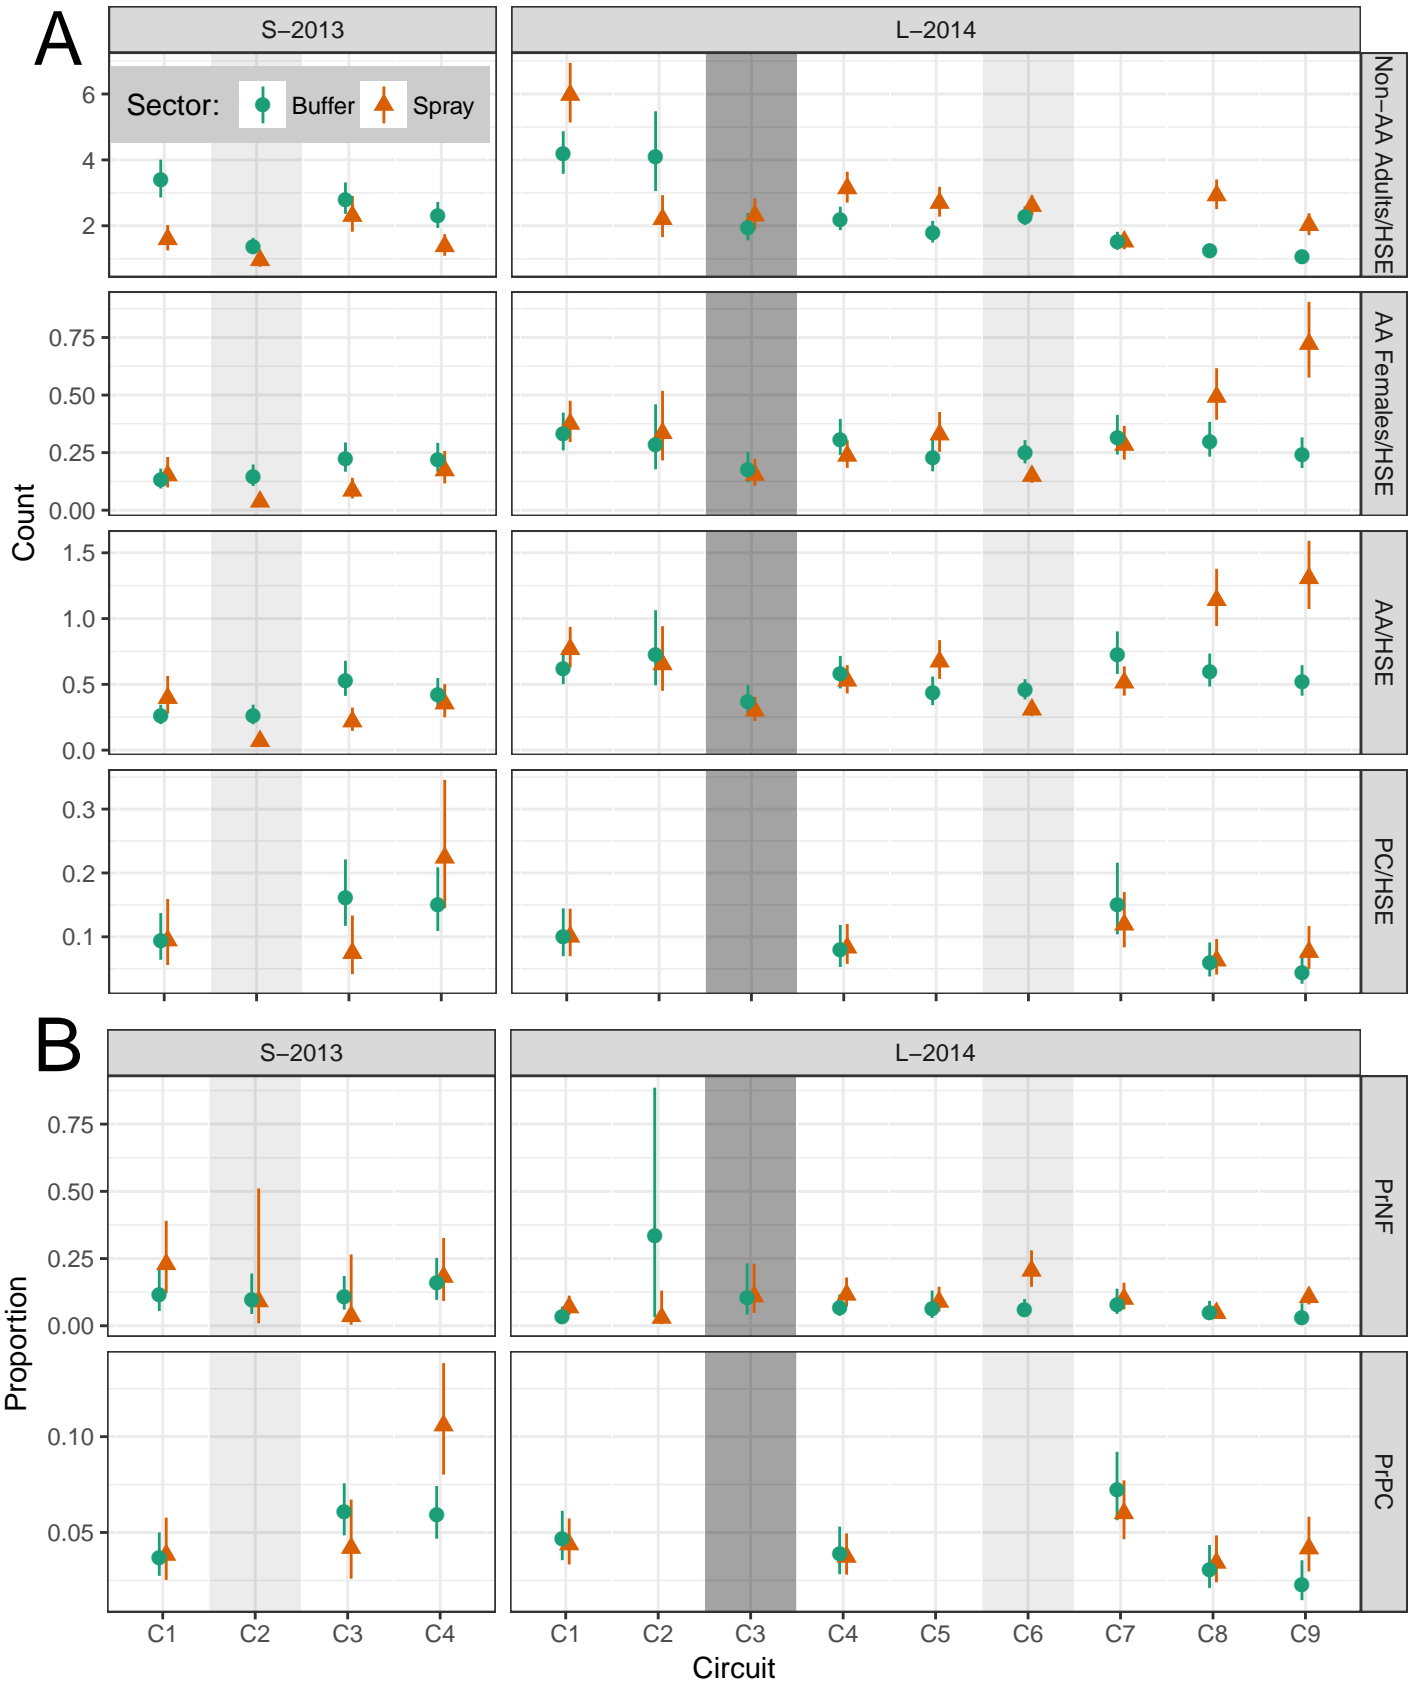

**Figure S5. Model results**, as in Fig. 4. All models include fixed effects of sector and circuit, with a separate model for each year. **A, Counts:** negative binomial GLM (NB-GLM). **B, Proportions:** logistic GLM (L-GLM). Breteau Index (BI) =  $100 \times \text{PC}/\text{HSE}$ . See also Tables S2-S10B.
