# Supplementary material for: Efficacy of Aedes aegypti control by indoor Ultra Low Volume (ULV) insecticide spraying in Iquitos, Peru
Source: PubMed Central journal article supplement (PMC5906025; doi:10.1371/journal.pntd.0006378), 2018-04-06
Supplement: pntd.0006378.s007.pdf [file pntd.0006378.s007.pdf]

Sector: ■ Buffer ■ Spray ■ Not Surveyed

Sector: ■ Buffer ■ Spray ■ Not Surveyed

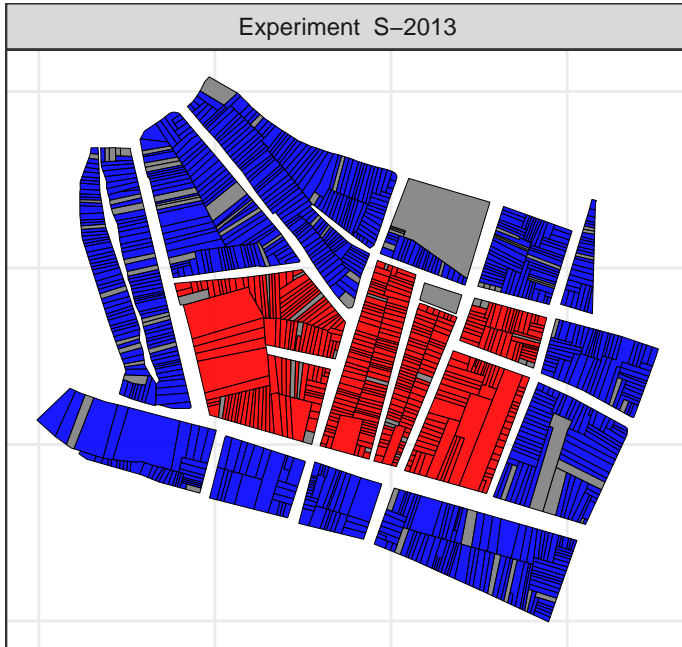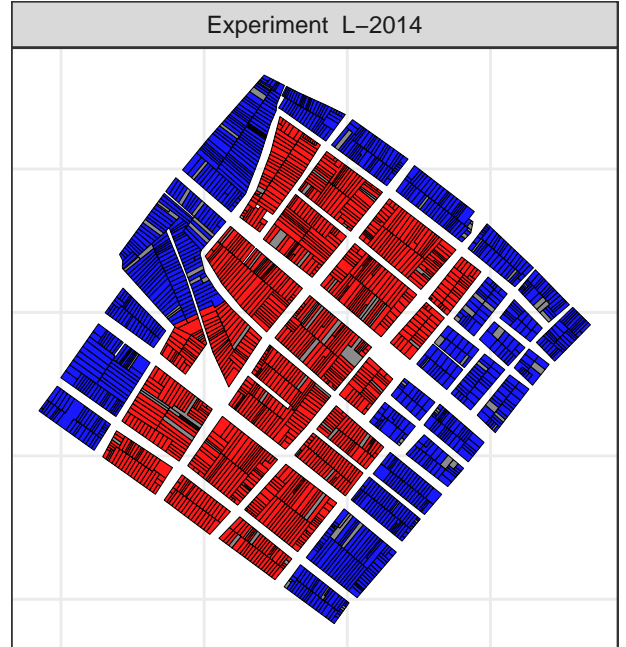

Sector: ■ Buffer ■ Spray ■ Not Surveyed

Sector: ■ Buffer ■ Spray ■ Not Surveyed

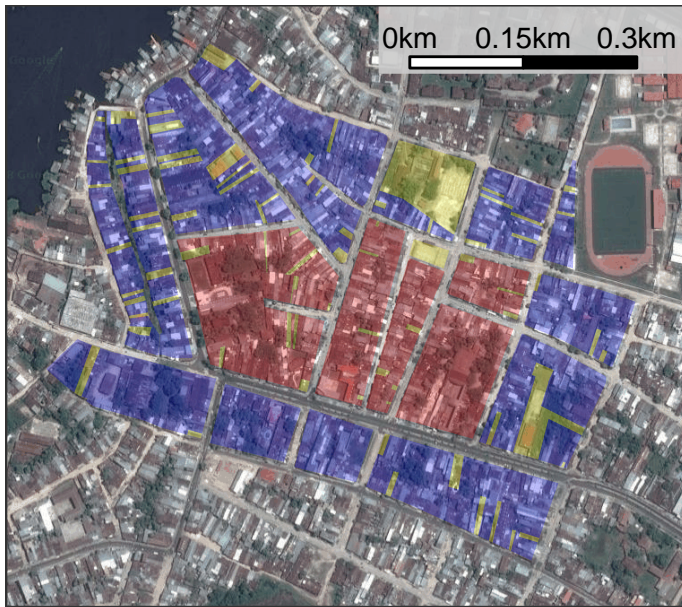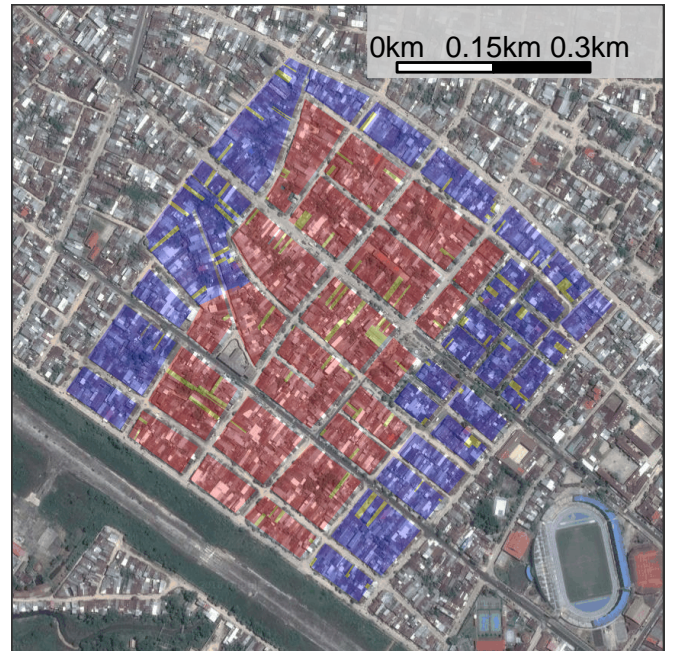

**Figure S6.** Maps of experimental areas, showing satellite imagery. Note the scale differs between experiments. See also Fig. 1.
