# Supplementary material for: Efficacy of Aedes aegypti control by indoor Ultra Low Volume (ULV) insecticide spraying in Iquitos, Peru
Source: PubMed Central journal article supplement (PMC5906025; doi:10.1371/journal.pntd.0006378), 2018-04-06
Supplement: pntd.0006378.s008.pdf [file pntd.0006378.s008.pdf]

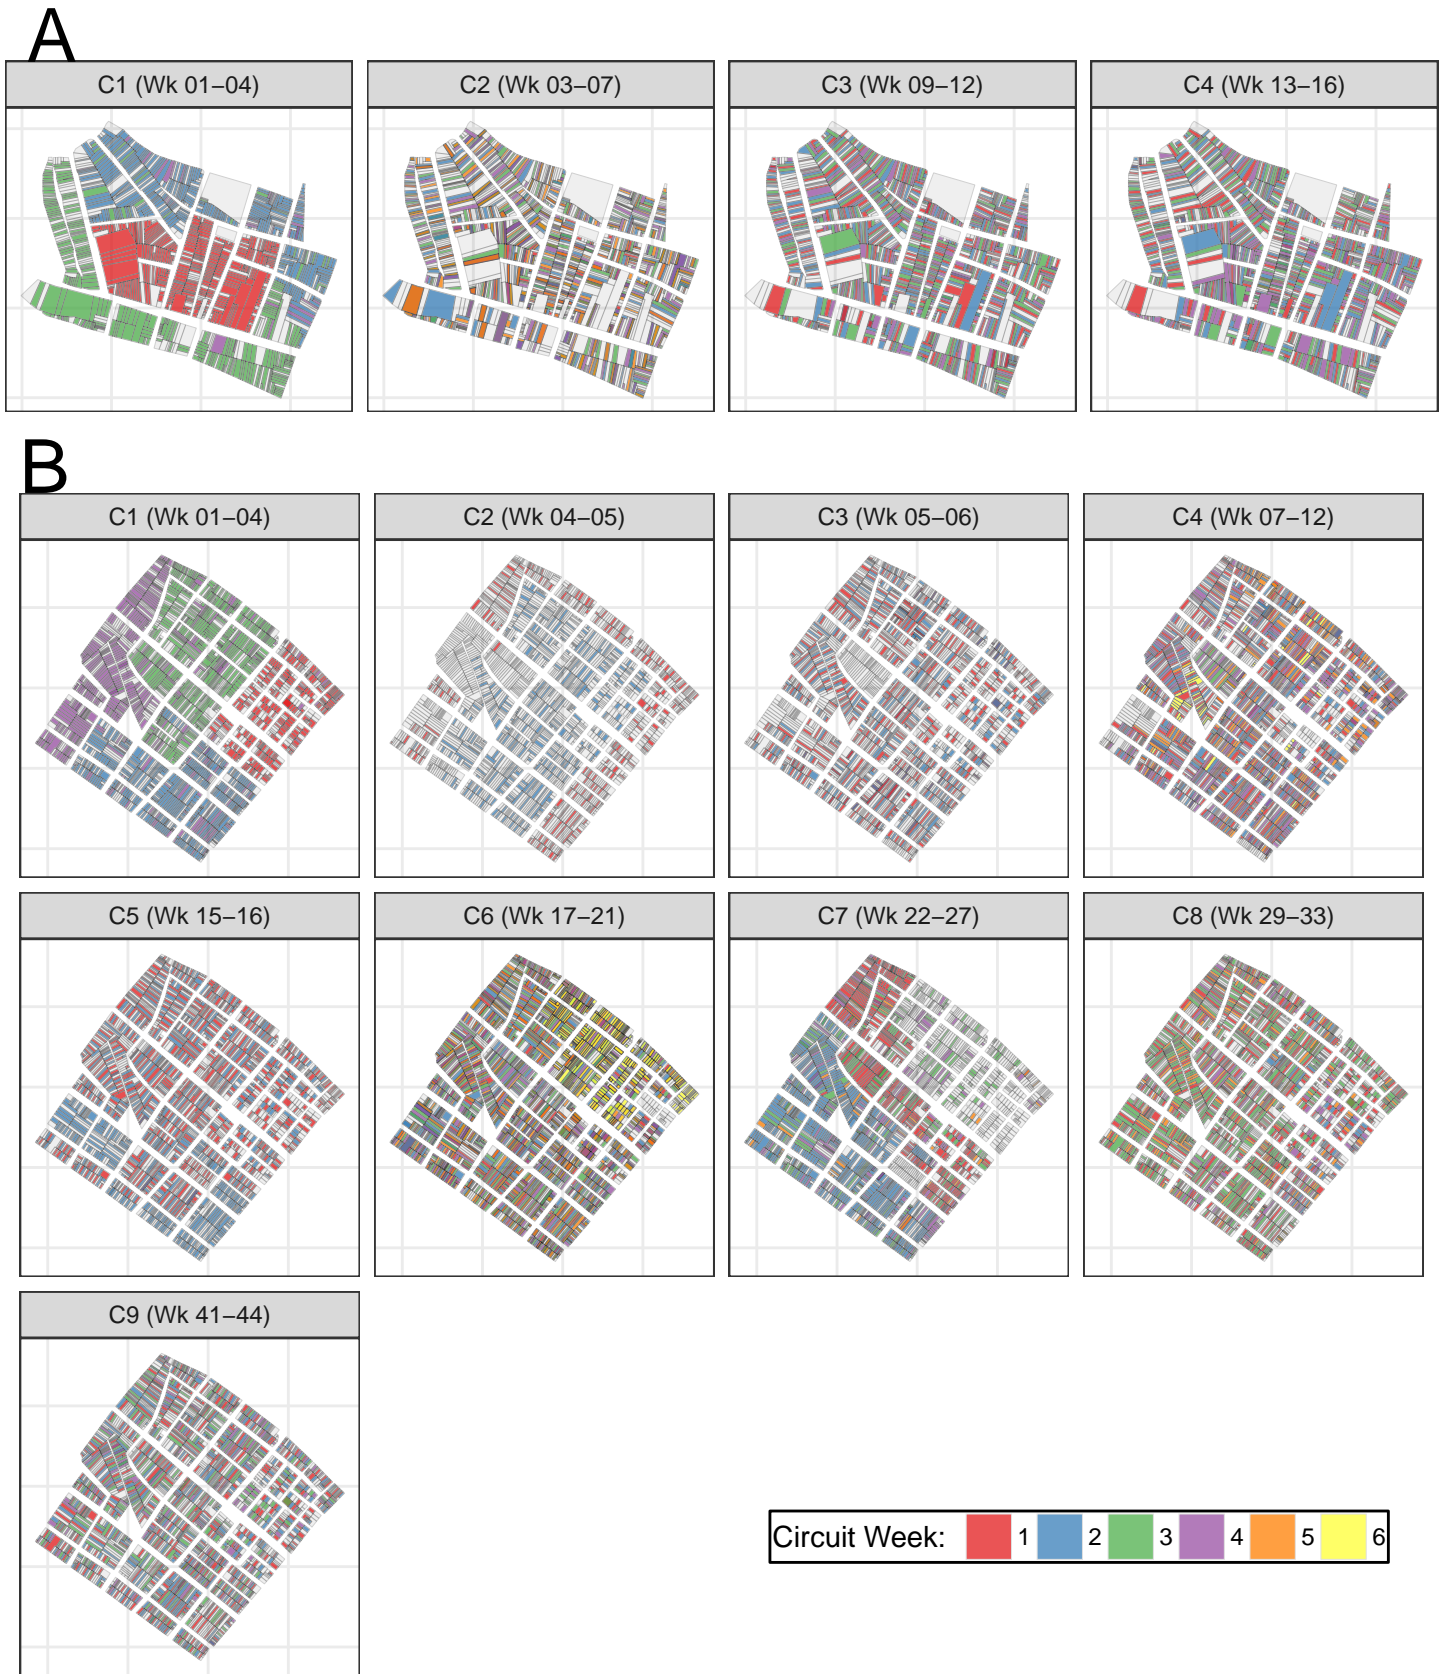

**Figure S7.** Maps showing survey locations by circuit (panel) and week within circuit (color). **A:** S-2013. **B:** L-2014.
