# Supplementary material for: Efficacy of Aedes aegypti control by indoor Ultra Low Volume (ULV) insecticide spraying in Iquitos, Peru
Source: PubMed Central journal article supplement (PMC5906025; doi:10.1371/journal.pntd.0006378), 2018-04-06
Supplement: pntd.0006378.s009.pdf [file pntd.0006378.s009.pdf]

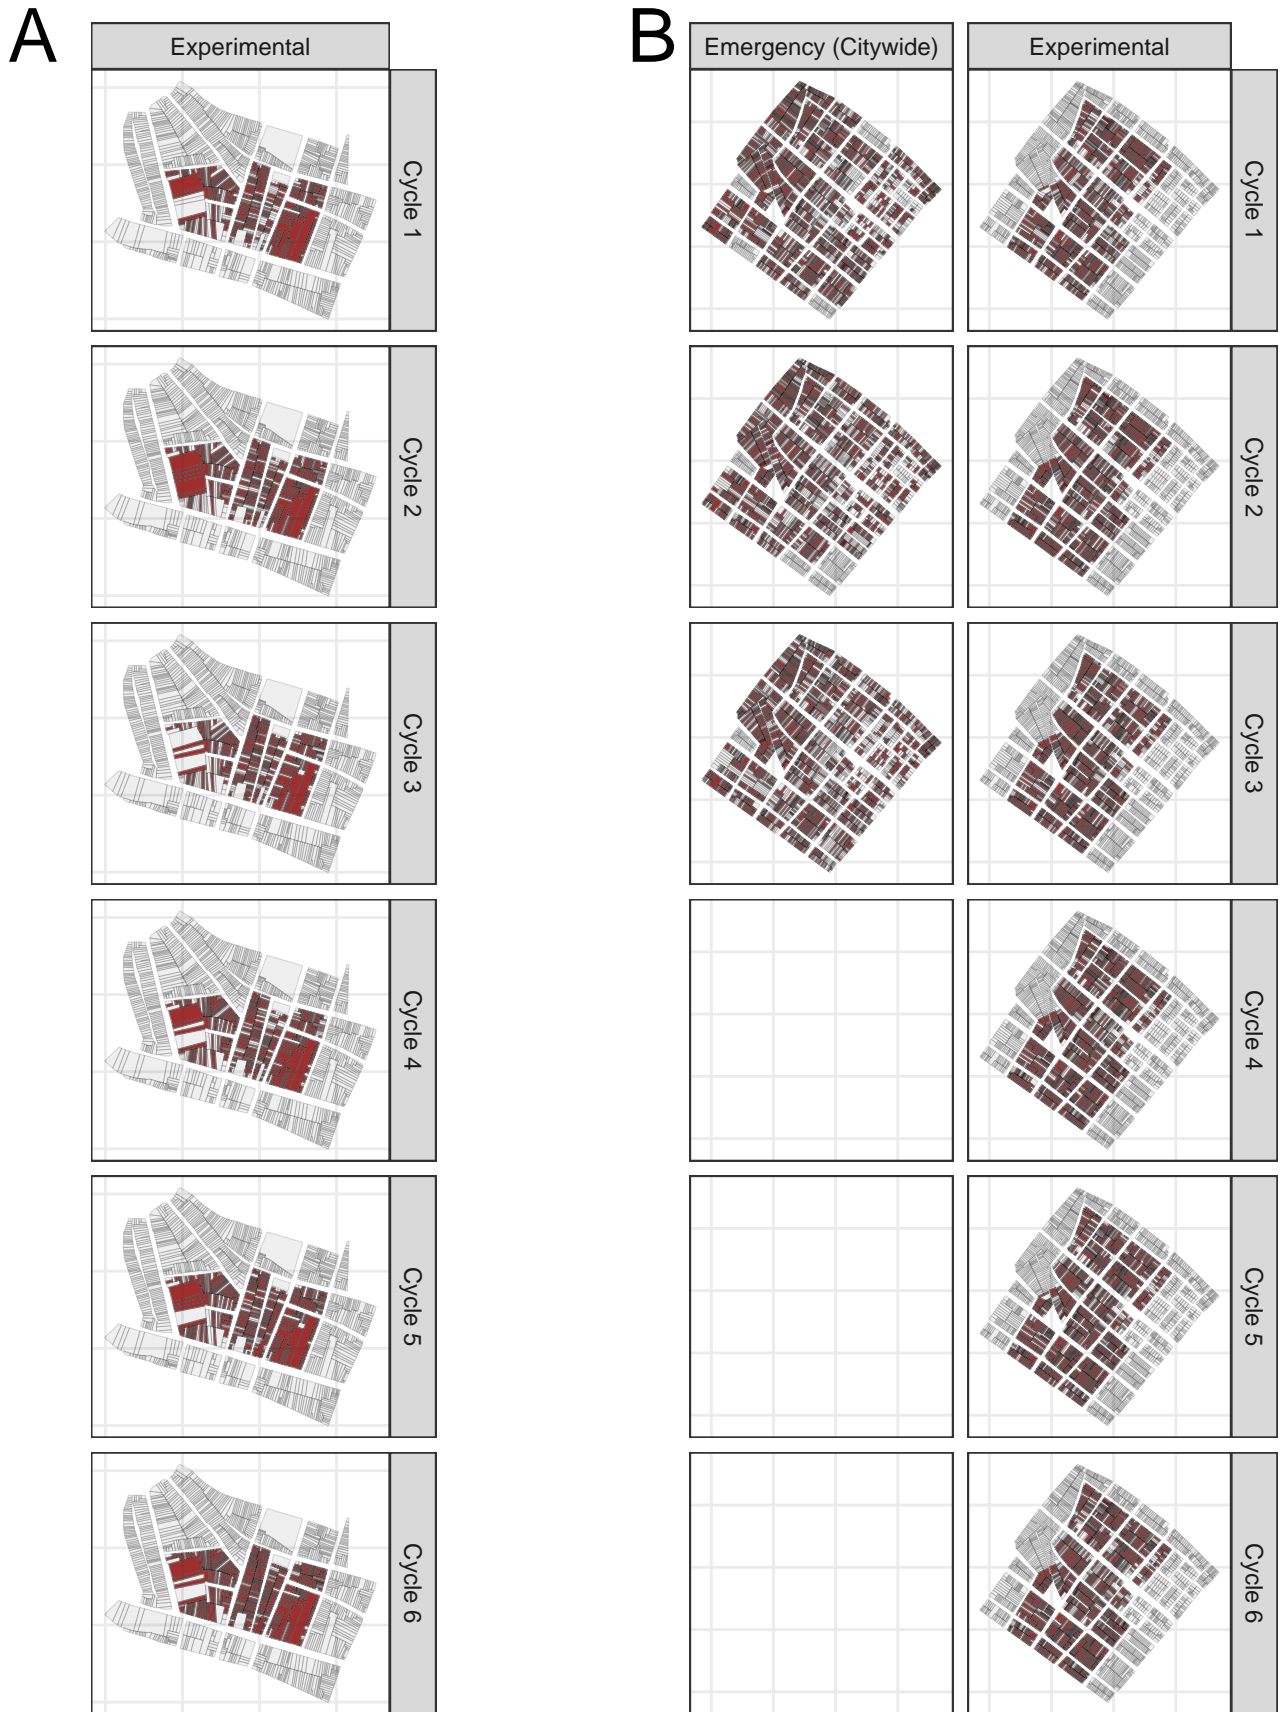

**Figure S8.** Maps of spray events (red) by spray cycle (rows). **A:** S-2013. **B:** L-2014. During L-2014, in addition to experimental spraying, 3 cycles of emergency citywide spraying were conducted. Note the map scale differs between **A** and **B**. See also Fig. 1. S16
