# Supplementary material for: Efficacy of Aedes aegypti control by indoor Ultra Low Volume (ULV) insecticide spraying in Iquitos, Peru
Source: PubMed Central journal article supplement (PMC5906025; doi:10.1371/journal.pntd.0006378), 2018-04-06
Supplement: pntd.0006378.s010.pdf [file pntd.0006378.s010.pdf]

| Experiment | Circuit | Weeks | Treatment      | Houses | Surveys | Full Surveys | Buffer | Spray |
|------------|---------|-------|----------------|--------|---------|--------------|--------|-------|
| S-2013     | C1      | 01-04 |                | 943    | 944     | 863          | 613    | 331   |
| S-2013     | C2      | 03-07 | Exper. spray   | 679    | 983     | 0            | 603    | 380   |
| S-2013     | C3      | 09-12 |                | 935    | 949     | 885          | 618    | 331   |
| S-2013     | C4      | 13-16 |                | 930    | 967     | 882          | 614    | 353   |
| L-2014     | C1      | 01-04 |                | 1470   | 1473    | 1289         | 729    | 744   |
| L-2014     | C2      | 04-05 |                | 430    | 430     | 0            | 203    | 227   |
| L-2014     | C3      | 05-06 | Citywide spray | 792    | 848     | 0            | 411    | 437   |
| L-2014     | C4      | 07-12 |                | 1452   | 1500    | 1359         | 704    | 796   |
| L-2014     | C5      | 15-16 |                | 1206   | 1212    | 0            | 567    | 645   |
| L-2014     | C6      | 17-21 | Exper. spray   | 1646   | 2502    | 0            | 1202   | 1300  |
| L-2014     | C7      | 22-27 |                | 1287   | 1319    | 1147         | 610    | 709   |
| L-2014     | C8      | 29-33 |                | 1461   | 1482    | 1267         | 720    | 762   |
| L-2014     | C9      | 41-44 |                | 1339   | 1358    | 1125         | 664    | 694   |

**Table S1. Observation counts by Circuit.** *Weeks*: Week number from experiment start. *Houses*: number of unique houses surveyed. *Surveys*: total surveys (either adult, or combined adult and immature). *Full Surveys*: surveys where both adult and immatures were surveyed. *Buffer, Spray*: surveys in buffer and spray sector, respectively.
