# Supplementary material for: Efficacy of Aedes aegypti control by indoor Ultra Low Volume (ULV) insecticide spraying in Iquitos, Peru
Source: PubMed Central journal article supplement (PMC5906025; doi:10.1371/journal.pntd.0006378), 2018-04-06
Supplement: pntd.0006378.s011.pdf [file pntd.0006378.s011.pdf]

| Experiment | Circuit | Weeks | Treatment      | Ratio | SE   | p.value         |
|------------|---------|-------|----------------|-------|------|-----------------|
| S-2013     | C1      | 01-04 |                | 1.52  | 0.31 | <b>0.0395</b>   |
| S-2013     | C2      | 03-07 | Exper. spray   | 0.26  | 0.07 | <b>4.16e-07</b> |
| S-2013     | C3      | 09-12 |                | 0.41  | 0.09 | <b>2.19e-05</b> |
| S-2013     | C4      | 13-16 |                | 0.84  | 0.16 | 0.357           |
| L-2014     | C1      | 01-04 |                | 1.24  | 0.16 | 0.09            |
| L-2014     | C2      | 04-05 | Citywide spray | 0.90  | 0.21 | 0.659           |
| L-2014     | C3      | 05-06 |                | 0.82  | 0.15 | 0.284           |
| L-2014     | C4      | 07-12 |                | 0.91  | 0.12 | 0.474           |
| L-2014     | C5      | 15-16 | Exper. spray   | 1.54  | 0.23 | <b>0.0034</b>   |
| L-2014     | C6      | 17-21 |                | 0.67  | 0.07 | <b>0.00028</b>  |
| L-2014     | C7      | 22-27 |                | 0.71  | 0.10 | <b>0.0132</b>   |
| L-2014     | C8      | 29-33 |                | 1.91  | 0.24 | <b>2.72e-07</b> |
| L-2014     | C9      | 41-44 |                | 2.53  | 0.34 | <b>2.67e-12</b> |

**Table S2. Comparison between sectors (within time):** Ratio of AA/HSE in spray sector relative to buffer sector (spray/buffer). **Bold p.values:** significant difference between sectors. In both years, the spray sector starts with more adults per house, and spraying reduces AA/HSE relative to buffer sectors. As in Table S3, the effects of spraying are most pronounced in 2013. See also Fig. 4A.

| Experiment | Circuit | Weeks | Treatment      | Ratio | SE   | p.value         |
|------------|---------|-------|----------------|-------|------|-----------------|
| S-2013     | C2      | 03-07 | Exper. spray   | 0.17  | 0.05 | <b>1.24e-09</b> |
| S-2013     | C3      | 09-12 |                | 0.55  | 0.13 | <b>0.0351</b>   |
| S-2013     | C4      | 13-16 |                | 0.89  | 0.20 | 0.944           |
| L-2014     | C2      | 04-05 | Citywide spray | 0.85  | 0.16 | 0.979           |
| L-2014     | C3      | 05-06 |                | 0.39  | 0.06 | <b>4.87e-08</b> |
| L-2014     | C4      | 07-12 |                | 0.69  | 0.09 | <b>0.0251</b>   |
| L-2014     | C5      | 15-16 | Exper. spray   | 0.88  | 0.12 | 0.954           |
| L-2014     | C6      | 17-21 |                | 0.40  | 0.05 | <b>8.97e-14</b> |
| L-2014     | C7      | 22-27 |                | 0.67  | 0.09 | <b>0.0173</b>   |
| L-2014     | C8      | 29-33 |                | 1.49  | 0.18 | <b>0.0103</b>   |
| L-2014     | C9      | 41-44 |                | 1.70  | 0.21 | <b>0.000172</b> |

**Table S3. Comparison between times (within spray sector):** Ratio of AA/HSE relative to baseline (C1, spray sector only). **Bold p.values:** significant difference from baseline circuit. In both years, spraying reduces AA/HSE relative to baseline (C1). The effects of spraying are most pronounced in S-2013, but are short-lived in both years. See also Fig. 4A.
