# Supplementary material for: Efficacy of Aedes aegypti control by indoor Ultra Low Volume (ULV) insecticide spraying in Iquitos, Peru
Source: PubMed Central journal article supplement (PMC5906025; doi:10.1371/journal.pntd.0006378), 2018-04-06
Supplement: pntd.0006378.s013.pdf [file pntd.0006378.s013.pdf]

| Experiment | Contrast                     | Ratio | SE   | p.value       |
|------------|------------------------------|-------|------|---------------|
| S-2013     | No Prior Spray / Prior Spray | 1.58  | 1.11 | 0.764         |
| L-2014     | No Prior Spray / Prior Spray | 2.01  | 0.62 | <b>0.0472</b> |
| L-2014     | Timing Unclear / Prior Spray | 0.71  | 0.26 | 0.566         |

**Table S4. Comparison between spray status (whether house was sprayed prior to survey):** Ratio of AA/HSE in houses that were either sprayed or not spray prior to surveying (no prior spray / prior spray). **Bold p.values:** In L-2014, houses without prior spraying yielded significantly more adults than houses with prior spraying. In S-2013, most houses were sprayed in the prior week. In L-2014, the exact date of spraying was uncertain for a small number of houses. See Table S5 for details.

| Experiment | Spray.status   | nObs | Group     | Est  | SE   | 95% CI    |
|------------|----------------|------|-----------|------|------|-----------|
| S-2013     | Prior Spray    | 311  | <b>b</b>  | 0.06 | 0.02 | 0.03-0.14 |
| S-2013     | No Prior Spray | 59   | <b>ab</b> | 0.10 | 0.06 | 0.02-0.54 |
| L-2014     | Prior Spray    | 889  | <b>a</b>  | 0.28 | 0.04 | 0.19-0.40 |
| L-2014     | No Prior Spray | 205  | <b>a</b>  | 0.56 | 0.15 | 0.27-1.15 |
| L-2014     | Timing Unclear | 164  | <b>ab</b> | 0.20 | 0.07 | 0.08-0.48 |

**Table S5. Effect of prior spray on AA/HSE.** A single model (NB-GLM) includes both experiment year and spray status as predictors. *Group:* significance groups (Tukey HSD) compare among all rows. Only house surveys in the spray sector during experimental spraying are included (i.e., S-2013 C2 and L-2014 C6). Not all sprayed houses were subsequently surveyed. The average interval between each house’s spray application and survey was shorter in L-2014 (median 2 days) than S-2013 (median 7 days). See also Table S4.
