# Supplementary material for: Efficacy of Aedes aegypti control by indoor Ultra Low Volume (ULV) insecticide spraying in Iquitos, Peru
Source: PubMed Central journal article supplement (PMC5906025; doi:10.1371/journal.pntd.0006378), 2018-04-06
Supplement: pntd.0006378.s015.pdf [file pntd.0006378.s015.pdf]

| Circuit | Weeks | Treatment    | Sector | nObs | Group | Est  | SE   | 95% CI    |
|---------|-------|--------------|--------|------|-------|------|------|-----------|
| C1      | 01-04 |              | Buffer | 613  | ab    | 0.26 | 0.03 | 0.19-0.37 |
| C2      | 03-07 |              | Buffer | 603  | ab    | 0.26 | 0.03 | 0.18-0.37 |
| C3      | 09-12 |              | Buffer | 618  | c     | 0.53 | 0.06 | 0.39-0.72 |
| C4      | 13-16 |              | Buffer | 614  | a c   | 0.42 | 0.05 | 0.31-0.58 |
| C1      | 01-04 | Exper. spray | Spray  | 331  | abc   | 0.40 | 0.06 | 0.26-0.61 |
| C2      | 03-07 |              | Spray  | 380  | d     | 0.07 | 0.02 | 0.04-0.13 |
| C3      | 09-12 |              | Spray  | 331  | b     | 0.22 | 0.04 | 0.13-0.35 |
| C4      | 13-16 |              | Spray  | 353  | abc   | 0.35 | 0.06 | 0.23-0.54 |

**Table S6A. *Ae. aegypti* adults per house (AA/HSE), 2013.** Model estimates by circuit and treatment sector. Horizontal line separates treatment sectors; significance groups (Tukey HSD) compare among all rows. See Fig. 4A for model description.

| Circuit | Weeks | Treatment      | Sector | nObs | Group  | Est  | SE   | 95% CI    |
|---------|-------|----------------|--------|------|--------|------|------|-----------|
| C1      | 01-04 |                | Buffer | 729  | abcd   | 0.62 | 0.06 | 0.47-0.81 |
| C2      | 04-05 |                | Buffer | 203  | abcdef | 0.72 | 0.12 | 0.43-1.21 |
| C3      | 05-06 | Citywide spray | Buffer | 411  | a gh   | 0.37 | 0.05 | 0.25-0.55 |
| C4      | 07-12 |                | Buffer | 704  | abcd   | 0.58 | 0.05 | 0.44-0.77 |
| C5      | 15-16 |                | Buffer | 567  | abc gh | 0.44 | 0.05 | 0.31-0.61 |
| C6      | 17-21 |                | Buffer | 1202 | a c g  | 0.46 | 0.03 | 0.36-0.57 |
| C7      | 22-27 |                | Buffer | 610  | b d    | 0.72 | 0.07 | 0.54-0.97 |
| C8      | 29-33 |                | Buffer | 720  | abcd   | 0.60 | 0.06 | 0.45-0.79 |
| C9      | 41-44 |                | Buffer | 664  | abcd g | 0.52 | 0.05 | 0.38-0.69 |
| C1      | 01-04 |                | Spray  | 744  | de     | 0.77 | 0.07 | 0.59-1.00 |
| C2      | 04-05 |                | Spray  | 227  | abcde  | 0.65 | 0.11 | 0.40-1.07 |
| C3      | 05-06 | Citywide spray | Spray  | 437  | gh     | 0.30 | 0.04 | 0.20-0.45 |
| C4      | 07-12 |                | Spray  | 796  | abcd g | 0.53 | 0.05 | 0.40-0.69 |
| C5      | 15-16 |                | Spray  | 645  | bcd    | 0.67 | 0.07 | 0.50-0.90 |
| C6      | 17-21 | Exper. spray   | Spray  | 1300 | h      | 0.31 | 0.02 | 0.24-0.39 |
| C7      | 22-27 |                | Spray  | 709  | abcd g | 0.51 | 0.05 | 0.39-0.68 |
| C8      | 29-33 |                | Spray  | 762  | ef     | 1.14 | 0.10 | 0.89-1.47 |
| C9      | 41-44 |                | Spray  | 694  | f      | 1.31 | 0.12 | 1.01-1.70 |

**Table S6B. *Ae. aegypti* adults per house (AA/HSE), 2014.** See Table S6A for details.
