# Supplementary material for: Efficacy of Aedes aegypti control by indoor Ultra Low Volume (ULV) insecticide spraying in Iquitos, Peru
Source: PubMed Central journal article supplement (PMC5906025; doi:10.1371/journal.pntd.0006378), 2018-04-06
Supplement: pntd.0006378.s016.pdf [file pntd.0006378.s016.pdf]

| Circuit | Weeks | Treatment    | Sector | nObs | Group | Est  | SE   | 95% CI    |
|---------|-------|--------------|--------|------|-------|------|------|-----------|
| C1      | 01-04 |              | Buffer | 613  | ab    | 0.15 | 0.01 | 0.11-0.19 |
| C2      | 03-07 |              | Buffer | 603  | ab    | 0.15 | 0.01 | 0.11-0.19 |
| C3      | 09-12 |              | Buffer | 618  | a c   | 0.21 | 0.02 | 0.17-0.26 |
| C4      | 13-16 |              | Buffer | 614  | c     | 0.23 | 0.02 | 0.19-0.28 |
| C1      | 01-04 |              | Spray  | 331  | abc   | 0.16 | 0.02 | 0.11-0.22 |
| C2      | 03-07 | Exper. spray | Spray  | 380  | d     | 0.06 | 0.01 | 0.03-0.10 |
| C3      | 09-12 |              | Spray  | 331  | b     | 0.13 | 0.02 | 0.08-0.19 |
| C4      | 13-16 |              | Spray  | 353  | abc   | 0.17 | 0.02 | 0.12-0.23 |

**Table S7A. Proportion *Ae. aegypti* adult-infested houses (PrIH), 2013.** Model estimates by circuit and treatment sector. Horizontal line separates treatment sectors; significance groups (Tukey HSD) compare among all rows. See Fig. 4B for model description.

| Circuit | Weeks | Treatment      | Sector | nObs | Group  | Est  | SE   | 95% CI    |
|---------|-------|----------------|--------|------|--------|------|------|-----------|
| C1      | 01-04 |                | Buffer | 729  | ab     | 0.31 | 0.02 | 0.26-0.36 |
| C2      | 04-05 |                | Buffer | 203  | abcd   | 0.33 | 0.03 | 0.24-0.43 |
| C3      | 05-06 | Citywide spray | Buffer | 411  | ef     | 0.16 | 0.02 | 0.11-0.22 |
| C4      | 07-12 |                | Buffer | 704  | abc g  | 0.26 | 0.02 | 0.22-0.32 |
| C5      | 15-16 |                | Buffer | 567  | c e g  | 0.22 | 0.02 | 0.17-0.28 |
| C6      | 17-21 |                | Buffer | 1202 | c e g  | 0.21 | 0.01 | 0.18-0.25 |
| C7      | 22-27 |                | Buffer | 610  | abc g  | 0.27 | 0.02 | 0.22-0.33 |
| C8      | 29-33 |                | Buffer | 720  | c e g  | 0.22 | 0.02 | 0.18-0.27 |
| C9      | 41-44 |                | Buffer | 664  | abc g  | 0.26 | 0.02 | 0.21-0.32 |
| C1      | 01-04 |                | Spray  | 744  | a d    | 0.34 | 0.02 | 0.29-0.39 |
| C2      | 04-05 |                | Spray  | 227  | abcd g | 0.29 | 0.03 | 0.21-0.39 |
| C3      | 05-06 | Citywide spray | Spray  | 437  | e g    | 0.18 | 0.02 | 0.13-0.24 |
| C4      | 07-12 |                | Spray  | 796  | bc e g | 0.23 | 0.01 | 0.19-0.28 |
| C5      | 15-16 |                | Spray  | 645  | abc    | 0.28 | 0.02 | 0.23-0.33 |
| C6      | 17-21 | Exper. spray   | Spray  | 1300 | f      | 0.11 | 0.01 | 0.09-0.14 |
| C7      | 22-27 |                | Spray  | 709  | c e g  | 0.22 | 0.02 | 0.18-0.27 |
| C8      | 29-33 |                | Spray  | 762  | a d    | 0.34 | 0.02 | 0.29-0.40 |
| C9      | 41-44 |                | Spray  | 694  | d      | 0.41 | 0.02 | 0.36-0.47 |

**Table S7B. Proportion *Ae. aegypti* adult-infested houses (PrIH), 2014.** See Table S7A for details.
