# Supplementary material for: Efficacy of Aedes aegypti control by indoor Ultra Low Volume (ULV) insecticide spraying in Iquitos, Peru
Source: PubMed Central journal article supplement (PMC5906025; doi:10.1371/journal.pntd.0006378), 2018-04-06
Supplement: pntd.0006378.s017.pdf [file pntd.0006378.s017.pdf]

| Circuit | Weeks | Treatment    | Sector | nObs | Group | Est  | SE   | 95% CI    |
|---------|-------|--------------|--------|------|-------|------|------|-----------|
| C1      | 01-04 |              | Buffer | 58   | a     | 0.11 | 0.04 | 0.05-0.25 |
| C2      | 03-07 |              | Buffer | 52   | a     | 0.10 | 0.03 | 0.04-0.22 |
| C3      | 09-12 |              | Buffer | 73   | a     | 0.11 | 0.03 | 0.05-0.21 |
| C4      | 13-16 |              | Buffer | 92   | a     | 0.16 | 0.03 | 0.09-0.28 |
| C1      | 01-04 |              | Spray  | 32   | a     | 0.23 | 0.06 | 0.10-0.43 |
| C2      | 03-07 | Exper. spray | Spray  | 9    | a     | 0.09 | 0.09 | 0.01-0.64 |
| C3      | 09-12 |              | Spray  | 23   | a     | 0.04 | 0.04 | 0.00-0.37 |
| C4      | 13-16 |              | Spray  | 34   | a     | 0.18 | 0.05 | 0.08-0.37 |

**Table S8A. Proportion nulliparous *Ae. aegypti* females (PrNF), 2013.** Model estimates by circuit and treatment sector. Horizontal line separates treatment sectors; significance groups (Tukey HSD) compare among all rows. See also Fig. S5.

| Circuit | Weeks | Treatment      | Sector | nObs | Group | Est  | SE   | 95% CI    |
|---------|-------|----------------|--------|------|-------|------|------|-----------|
| C1      | 01-04 |                | Buffer | 144  | a     | 0.03 | 0.01 | 0.01-0.09 |
| C2      | 04-05 |                | Buffer | 3    | ab    | 0.33 | 0.27 | 0.01-0.95 |
| C3      | 05-06 | Citywide spray | Buffer | 39   | ab    | 0.10 | 0.04 | 0.03-0.29 |
| C4      | 07-12 |                | Buffer | 120  | a     | 0.07 | 0.02 | 0.03-0.14 |
| C5      | 15-16 |                | Buffer | 76   | ab    | 0.06 | 0.02 | 0.02-0.17 |
| C6      | 17-21 |                | Buffer | 155  | a     | 0.06 | 0.01 | 0.03-0.12 |
| C7      | 22-27 |                | Buffer | 93   | ab    | 0.08 | 0.02 | 0.04-0.16 |
| C8      | 29-33 |                | Buffer | 95   | a     | 0.05 | 0.01 | 0.02-0.11 |
| C9      | 41-44 |                | Buffer | 93   | a     | 0.03 | 0.01 | 0.01-0.12 |
| C1      | 01-04 |                | Spray  | 155  | a     | 0.07 | 0.02 | 0.03-0.13 |
| C2      | 04-05 |                | Spray  | 39   | ab    | 0.03 | 0.02 | 0.00-0.21 |
| C3      | 05-06 | Citywide spray | Spray  | 47   | ab    | 0.11 | 0.04 | 0.04-0.29 |
| C4      | 07-12 |                | Spray  | 106  | ab    | 0.12 | 0.02 | 0.06-0.21 |
| C5      | 15-16 |                | Spray  | 101  | ab    | 0.09 | 0.02 | 0.04-0.17 |
| C6      | 17-21 | Exper. spray   | Spray  | 95   | b     | 0.20 | 0.03 | 0.13-0.31 |
| C7      | 22-27 |                | Spray  | 96   | ab    | 0.10 | 0.02 | 0.05-0.19 |
| C8      | 29-33 |                | Spray  | 161  | a     | 0.05 | 0.01 | 0.02-0.09 |
| C9      | 41-44 |                | Spray  | 197  | ab    | 0.11 | 0.01 | 0.07-0.16 |

**Table S8B. Proportion nulliparous *Ae. aegypti* females (PrNF), 2014.** See Table S8A for details.
