# Supplementary material for: Efficacy of Aedes aegypti control by indoor Ultra Low Volume (ULV) insecticide spraying in Iquitos, Peru
Source: PubMed Central journal article supplement (PMC5906025; doi:10.1371/journal.pntd.0006378), 2018-04-06
Supplement: pntd.0006378.s018.pdf [file pntd.0006378.s018.pdf]

| Circuit | Weeks | Sector | nObs | Group | Est  | SE   | 95% CI      |
|---------|-------|--------|------|-------|------|------|-------------|
| C1      | 01-04 | Buffer | 565  | a     | 0.09 | 0.02 | 0.060-0.147 |
| C3      | 09-12 | Buffer | 590  | ab    | 0.16 | 0.02 | 0.111-0.234 |
| C4      | 13-16 | Buffer | 583  | ab    | 0.15 | 0.02 | 0.103-0.221 |
| C1      | 01-04 | Spray  | 297  | ab    | 0.09 | 0.02 | 0.051-0.175 |
| C3      | 09-12 | Spray  | 282  | a     | 0.07 | 0.02 | 0.038-0.148 |
| C4      | 13-16 | Spray  | 268  | b     | 0.22 | 0.04 | 0.134-0.373 |

**Table S9A. *Ae. aegypti* Positive Containers per House (PC/HSE), 2013.** Breteau index (BI) =  $100 \times \text{PC}/\text{HSE}$ . Model estimates by circuit and treatment sector. Horizontal line separates treatment sectors; significance groups (Tukey HSD) compare among all rows. No container surveys were conducted during spraying. See also Fig. S5.

| Circuit | Weeks | Sector | nObs | Group | Est  | SE   | 95% CI      |
|---------|-------|--------|------|-------|------|------|-------------|
| C1      | 01-04 | Buffer | 638  | abc   | 0.10 | 0.02 | 0.063-0.159 |
| C4      | 07-12 | Buffer | 606  | abc   | 0.08 | 0.01 | 0.048-0.131 |
| C7      | 22-27 | Buffer | 514  | a     | 0.15 | 0.02 | 0.095-0.237 |
| C8      | 29-33 | Buffer | 629  | bc    | 0.06 | 0.01 | 0.034-0.102 |
| C9      | 41-44 | Buffer | 564  | b     | 0.04 | 0.01 | 0.023-0.084 |
| C1      | 01-04 | Spray  | 649  | abc   | 0.10 | 0.02 | 0.064-0.158 |
| C4      | 07-12 | Spray  | 710  | abc   | 0.08 | 0.01 | 0.052-0.132 |
| C7      | 22-27 | Spray  | 613  | a c   | 0.12 | 0.02 | 0.076-0.186 |
| C8      | 29-33 | Spray  | 621  | bc    | 0.06 | 0.01 | 0.037-0.108 |
| C9      | 41-44 | Spray  | 551  | abc   | 0.08 | 0.01 | 0.045-0.130 |

**Table S9B. *Ae. aegypti* Positive Containers per House (PC/HSE), 2014.** Breteau index (BI) =  $100 \times \text{PC}/\text{HSE}$ . See Table S9A for details.
