# Supplementary material for: Efficacy of Aedes aegypti control by indoor Ultra Low Volume (ULV) insecticide spraying in Iquitos, Peru
Source: PubMed Central journal article supplement (PMC5906025; doi:10.1371/journal.pntd.0006378), 2018-04-06
Supplement: pntd.0006378.s019.pdf [file pntd.0006378.s019.pdf]

| Circuit | Weeks | Sector | nObs | Group | Est  | SE   | 95% CI      |
|---------|-------|--------|------|-------|------|------|-------------|
| C1      | 01-04 | Buffer | 565  | a     | 0.04 | 0.00 | 0.026-0.053 |
| C3      | 09-12 | Buffer | 590  | b     | 0.06 | 0.01 | 0.047-0.079 |
| C4      | 13-16 | Buffer | 583  | ab    | 0.06 | 0.01 | 0.045-0.077 |
| C1      | 01-04 | Spray  | 297  | ab    | 0.04 | 0.01 | 0.023-0.062 |
| C3      | 09-12 | Spray  | 282  | ab    | 0.04 | 0.01 | 0.024-0.073 |
| C4      | 13-16 | Spray  | 268  | c     | 0.11 | 0.01 | 0.076-0.145 |

**Table S10A. Proportion *Ae. aegypti* Positive Containers (PrPC), 2013.** Model estimates by circuit and treatment sector. Horizontal line separates treatment sectors; significance groups (Tukey HSD) compare among all rows. No container surveys were conducted during spraying. See also Fig. S5.

| Circuit | Weeks | Sector | nObs | Group | Est  | SE   | 95% CI      |
|---------|-------|--------|------|-------|------|------|-------------|
| C1      | 01-04 | Buffer | 638  | abc   | 0.05 | 0.01 | 0.033-0.066 |
| C4      | 07-12 | Buffer | 606  | ab    | 0.04 | 0.01 | 0.026-0.057 |
| C7      | 22-27 | Buffer | 514  | c     | 0.07 | 0.01 | 0.053-0.098 |
| C8      | 29-33 | Buffer | 629  | a     | 0.03 | 0.00 | 0.019-0.048 |
| C9      | 41-44 | Buffer | 564  | a     | 0.02 | 0.00 | 0.013-0.040 |
| C1      | 01-04 | Spray  | 649  | abc   | 0.04 | 0.01 | 0.031-0.061 |
| C4      | 07-12 | Spray  | 710  | ab    | 0.04 | 0.00 | 0.026-0.053 |
| C7      | 22-27 | Spray  | 613  | bc    | 0.06 | 0.01 | 0.044-0.082 |
| C8      | 29-33 | Spray  | 621  | ab    | 0.03 | 0.01 | 0.022-0.053 |
| C9      | 41-44 | Spray  | 551  | abc   | 0.04 | 0.01 | 0.027-0.063 |

**Table S10B. Proportion *Ae. aegypti* Positive Containers (PrPC), 2014.** See Table S10A for details.
